1 **Transient genomic instability drives tumorigenesis through accelerated clonal**  
2 **evolution**

3 Ofer Shoshani<sup>1</sup>, Bjorn Bakker<sup>2</sup>, Yin Wang<sup>1</sup>, Dong Hyun Kim<sup>1</sup>, Marcus Maldonado<sup>1</sup>,  
4 Matthew A. Demarest<sup>1</sup>, Jon Artates<sup>1</sup>, Ouyang Zhengyu<sup>3</sup>, Adam Mark<sup>4</sup>, Rene  
5 Wardenaar<sup>2</sup>, Roman Sasik<sup>4</sup>, Diana C.J. Spierings<sup>2</sup>, Benjamin Vitre<sup>1,5</sup>, Kathleen Fisch<sup>4</sup>,  
6 Floris Foijer<sup>2,6</sup>, and Don W. Cleveland<sup>1,6</sup>

7

8 <sup>1</sup> Ludwig Cancer Research and Department of Cellular and Molecular Medicine,  
9 University of California at San Diego, La Jolla, CA, USA.

10 <sup>2</sup>European Research Institute for the Biology of Ageing (ERIBA), University of Groningen,  
11 University Medical Center Groningen, 9713 AV, Groningen, The Netherlands.

12 <sup>3</sup> Department of Cellular and Molecular Medicine, University of California at San Diego,  
13 La Jolla, CA, USA.

14 <sup>4</sup> Center for Computational Biology & Bioinformatics, Department of Medicine, University  
15 of California, San Diego, La Jolla, CA, USA.

16 <sup>5</sup> Current affiliation: CRBM, Univ Montpellier, CNRS, Montpellier, France.

17 <sup>6</sup> Corresponding authors: [dcleland@ucsd.edu](mailto:dcleland@ucsd.edu) (D.W.C.), [f.foijer@umcg.nl](mailto:f.foijer@umcg.nl) (F.F.)

18

19

20

21

22

23

24

25 **Abstract**

26 Abnormal numerical and structural chromosome content is frequently found in human  
27 cancer. To test the role of aneuploidy in tumor initiation and progression, we compared  
28 tumor development in mice with chronic chromosome instability (CIN) induced by  
29 inactivation of the spindle assembly checkpoint (produced by Mad2 deficiency) and mice  
30 with transient CIN through transiently increased expression of polo-like kinase 4 (PLK4),  
31 a master regulator of centrosome number. Tumors forming under chronic CIN gradually  
32 trended toward chromosomal gains producing a specific karyotype profile that could only  
33 be partially maintained in end-stage tumors, as determined by single-cell whole genome  
34 DNA sequencing. Short term CIN from transient PLK4 induction generated significant  
35 centrosome amplification and aneuploidy resulting in formation of aggressive T cell  
36 lymphomas in mice with heterozygous inactivation of one p53 allele or accelerated tumor  
37 development in the absence of p53. Transient CIN increased the frequency of lymphoma-  
38 initiating cells (as revealed by T cell receptor sequencing) with a specific karyotype profile  
39 containing triploid chromosomes 4, 5, 14, and 15 occurring early in tumorigenesis.  
40 Overall, our evidence demonstrates that distinct CIN mechanisms drive cancers  
41 presenting specific, complex chromosomal alterations with transient CIN rapidly  
42 enhancing tumor formation by accelerating the generation of such events.

43

44

45

46

47

48

49

50

51

52

## 53 Introduction

54 More than a century ago chromosome instability (CIN) leading to aneuploidy was  
55 recognized as a major hallmark in cancer<sup>1,2</sup>. Aneuploidy is frequently found in multiple  
56 types of cancer<sup>3</sup> and is correlated with poor prognosis<sup>4</sup>. Although linkage of aneuploidy  
57 and tumorigenesis was proposed by Boveri in 1902<sup>5</sup>, the role of aneuploidy in cancer  
58 formation remains controversial. It has been proposed that increased CIN leading to  
59 aneuploid genotypes serves as a risk factor for carcinogenesis<sup>6,7</sup>. Indeed, reduced levels  
60 of the kinesin family motor protein CENP-E drives CIN from missegregation of individual  
61 whole chromosomes and this generates spontaneous lymphomas and lung cancers<sup>8</sup>.  
62 Similarly, chronic CIN from weakening of the spindle assembly checkpoint (through  
63 reduction or mutation in Bub1<sup>9</sup> or from reduction in the Mps1 kinase<sup>10</sup>) drives tumors in  
64 mice through loss of tumor suppressor genes. Alternatively, genome doubling yielding  
65 tetraploid cells can serve as an intermediate step towards aneuploidy and cancer<sup>11</sup>  
66 although tetraploidy can also protect against cell transformation<sup>12</sup>. Specific aneuploid  
67 backgrounds have been reported to suppress cell viability, even under oncogenic  
68 induction, thereby preventing transformation, but in cancer, aneuploidy is frequently  
69 linked to more aggressive phenotypes<sup>13,14</sup>. While chronic CIN at a high level can act as a  
70 tumor suppressor<sup>15</sup>, whether aneuploidy once developed persists in healthy cells or  
71 whether it can drive transformation or cancer initiation is not determined.

72 Centriole duplication is controlled by Polo-like kinase 4 (Plk4)<sup>16,17</sup>, a self-regulatory  
73 kinase<sup>18</sup>. Overexpression of Plk4 leads to centrosome amplification which can persist  
74 under p53 deficiency<sup>18</sup> and drives CIN through merotelic attachment of chromosomes<sup>19</sup>.  
75 Indeed, centrosome amplification can be detected in pre-malignant cells in Barrett's  
76 Esophagus and persists through malignant transformation<sup>20</sup>. The first direct evidence for  
77 a role of centrosome amplification in tumor formation came from flies in which increased  
78 SAK/Plk4 expression enabled tumorigenic growth of larval brain cells<sup>21</sup>. Chronic induction  
79 of high levels of Plk4 in mice did not increase spontaneous tumor formation even in a p53  
80 deficient background<sup>22</sup>, probably due to an excessive rate of continuous CIN. However,  
81 milder chronic Plk4 overexpression has been reported to promote spontaneous  
82 tumorigenesis in wild-type<sup>23</sup> and deficient p53 mice<sup>24</sup>. Overexpression of Plk4 during  
83 development of p53 null skin cells enhances skin cancer in adult mice<sup>25</sup>.

84 By transiently inducing Plk4 overexpression in mice we now use multiple sequencing  
85 approaches to demonstrate that transient CIN serves to enhance tumor formation by  
86 increasing tumor initiating cell frequency and by accelerating acquisition of a specific  
87 aneuploidy profile. This profile includes the gain of additional chromosomes 4, 5, 14, and  
88 15, a tumor karyotype we demonstrate to develop early during tumorigenesis under  
89 transient CIN, and also in end-stage tumors forming under chronic CIN from inactivation  
90 of the spindle assembly checkpoint (SAC). Transcriptomic analysis revealed that this  
91 aneuploidy profile drives a gene expression program that is also frequently observed in  
92 multiple human cancers. We conclude that transient CIN is a powerful mechanism driving  
93 tumors with a specific aneuploidy profile.

## 94 **Results**

### 95 **Aneuploidy selection in tumors under chronic CIN driven by deletion of Mad2**

96 We initially used single-cell whole genome DNA sequencing (scWGS) to examine  
97 aneuploidy evolution during the development of tumors formed after silencing the SAC by  
98 selective inactivation in the thymus of both alleles encoding Mad2, thereby driving chronic  
99 CIN (Supplementary Figure 1a-b). Thymic tumors of different sizes were collected after  
100 Cre-recombinase (encoded by Lck promoted Cre transgene) mediated homozygous  
101 inactivation in T lymphocytes of “floxed” Mad2 and p53 genes in mice. Selective Mad2  
102 deletion (in Lck-Cre<sup>+</sup>; Mad2<sup>f/f</sup>; p53<sup>f/f</sup> mice) occurs ~6 weeks of age when Lck expression  
103 initiates in T cells<sup>26</sup>.

104 We previously showed that Lck-Cre; Mad2<sup>f/f</sup>; p53<sup>f/f</sup> mice succumb to thymic lymphomas  
105 within ~4 months with recurrent aneusomies involving chromosomes 4, 5, 14, 15 and  
106 17<sup>26</sup>. To determine when in tumorigenesis these clonal karyotypes emerged, thymuses  
107 were harvested from mice aged between 8 and 16 weeks representing a spectrum of  
108 tumor development from early (100-500mg) to advanced (>500mg) thymic lymphomas  
109 (Figure 1a). Each was homogenized and single-cell suspensions were used for single cell  
110 whole-genome sequencing and bulk homogenates were used for transcriptome analyses  
111 (RNA sequencing or RNA-seq) (Figure 1a). Initially, to determine the influence of SAC  
112 inactivation on potential aneuploidy development in wild-type p53 mice, analyses from  
113 two Mad2<sup>f/f</sup>; Lck-Cre<sup>+</sup> thymuses from 8-week old mice revealed 48% and 46%

114 aneuploidy (with aneuploidy scored by either gains or losses of at least one  
115 chromosome). No selection for specific chromosome copy number changes was  
116 identified (Figure 1b and Supplementary Figure 1c).

117 Genomic examination of developing (early tumors, Figure 1c) or advanced (late tumors,  
118 Figure 1d) thymic lymphomas revealed large chromosome changes, with an  
119 overwhelming majority of tumor cells presenting chromosome gains accompanied by few  
120 or no losses. Gains of chromosomes 4, 5, 14, 15 and 17 (Figure 1e) became more  
121 frequent in advanced tumors (Figure 1f-g). Analysis of tumor genome heterogeneity and  
122 copy number (CN) changes scores (Supplementary Figure 1d, see Methods for detailed  
123 definitions) revealed increased CN changes, but not heterogeneity, correlated with tumor  
124 progression. Some of the developing lymphomas, most notably M503, M522 and M559,  
125 showed aneuploidy landscapes similar to the *Mad2f/f; Lck-Cre<sup>+</sup>* thymuses (Compare  
126 Figures 1b and 1c), with similar CN scores, heterogeneity, and percentage of aneuploid  
127 cells (Supplementary Figure 1c-d), indicating that selection for chromosome aberrations  
128 had not (yet) occurred. The lack of selection for chromosome aberrations is illustrated  
129 clearly in M522 whose thymus weight was near 500 mg, indicative of tumor development,  
130 although most single cells sequences were euploid with others only showing random  
131 aneusomies. In contrast, other developing lymphomas showed signs of aneuploidy  
132 karyotype selection indicated by preferential chromosome copy number changes that  
133 became more apparent in endpoint lymphomas (Figure 1f-g). An increase in the number  
134 of copy number transitions indicative of structural damage within chromosomes was also  
135 observed in advanced tumors (Supplementary Figure 1d). Thus, chronic CIN from SAC  
136 inactivation yields thymic tumors that have gradually acquired an aneuploidy profile with  
137 chromosome copy number increases in chromosomes 4, 5, 14, 15, and 17.

### 138 **Transient PLK4 overexpression leads to transient chromosome instability**

139 We next determined how transient chromosome instability affected tumorigenesis by  
140 generating a mouse with an inducible *Plk4* gene in the background of different p53  
141 genotypes. This was achieved by two rounds of breeding (Figure 2a) to generate mice  
142 (to be referred to as **PRG5** mice) in a congenic background that carried 1) a doxycycline-  
143 regulated **PLK4-EYFP** gene<sup>23</sup>, 2) a gene encoding the **R**everse tetracycline transactivator  
144 (rtTA) whose expression permitted doxycycline-inducible expression of PLK4

145 (Supplementary Figure 2a), 3) a gene encoding centrin-**GFP**<sup>27</sup>, and 4) in which neither,  
146 one, or both p53 alleles were inactivated<sup>28</sup>.

147 Doxycycline-dependent PLK4 induction was initially validated independent of p53 status  
148 in mouse embryonic fibroblasts (MEFs) derived from PRG5 mice. Increased (4-fold) PLK4  
149 RNA levels and centrosome numbers (up to 6-fold) were found within two days of PLK4  
150 induction (Supplementary Figure 2b-c). Live cell imaging revealed that centrosome  
151 amplification initiated within 6 hours after PLK4 induction (Figure 2b), producing >50%  
152 abnormal defective mitoses and binucleated daughter cells or cells with micronuclei  
153 (Figure 2c). PRG5 mice fed for two weeks with doxycycline-containing food (Figure 2d),  
154 had increased PLK4 RNA levels in the thymus (3-fold), spleen (2.5-fold), liver (2-fold),  
155 colon (20-fold), and skin (20-fold), but not in lung or kidney (Figure 2e and Supplementary  
156 Figure 2d). Plk4 induction was transient, as PLK4 RNA levels returned to basal levels  
157 within one month after discontinuing doxycycline.

158 Increased PLK4 RNAs in thymic cells produced transient centrosome amplification  
159 (Figure 2f and Supplementary Figure 2e) and CIN, leading to aneuploidy just after  
160 doxycycline removal with both gain and loss of chromosome 11 copy numbers in  
161 thymocytes (3-fold increase in aneuploidy, Figure 2g) as determined using interphase  
162 DNA fluorescent in-situ hybridization (FISH), but not in splenocytes (where there was only  
163 mild PLK4 RNA induction - Supplementary Figure 2d,f). Aneuploidy levels determined on  
164 a whole genome scale using scWGS (Figure 2h-m) revealed a transient increase in  
165 aneuploidy from near zero (0-4% before Plk4 induction) to 24-40% after transient (two-  
166 week Plk4 induction) CIN, which returned to near zero within one month after doxycycline  
167 withdrawal. Importantly, transient CIN produced heterogenous aneuploidy, with some  
168 single cells gaining/losing one chromosome and some gaining/losing up to 9  
169 chromosomes (Figure 2h-m).

### 170 **Transient CIN drives thymic lymphoma initiation and acceleration**

171 Survival and tumor formation were monitored for more than two years in PRG5 mice  
172 following two-week CIN induction beginning at 4 weeks of age (Figure 2d). In mice with  
173 wild-type p53, there was no decreased survival (median survival 837 days and 805 days  
174 in control and treated mice, respectively - Figure 3a) and no increase in tumor formation

175 (17/42 and 13/49 control and treated mice with tumors, respectively - Figure 3b and  
176 Supplementary Figure 3a) as previously observed<sup>10,26</sup>. Tumor spectrum profile in aged  
177 PRG5 p53<sup>+/+</sup> mice (Figure 3c) was also not affected by PLK4 induction, with a majority  
178 of tumors forming in spleen (~40%), the digestive system (colorectal and intestinal tumors  
179 ~20%), and liver (~17%).

180 Tumors in PRG5 mice heterozygous for p53 (overall frequency of 45.1%) were identified  
181 as early as 7 months of age, but thymic tumors were rare (3.2%). In contrast, two weeks  
182 of transient CIN led to a doubling in tumor frequency (83.3%) and reduced survival  
183 (median 341 vs. 537 days - Figure 3d), with very early onset tumor formation (starting at  
184 100 days of age - Supplementary Figure 3b-c), the majority (54.8%) of which were thymic  
185 tumors (Figure 3e) and a clearly altered tumor spectrum profile (Figure 3f). Halving the  
186 period of CIN to only one week produced no effect on survival (median survival – 556  
187 days vs. 507 days of uninduced mice) and only 1/10 mice presented a thymic lymphoma  
188 (Supplementary Figure 3d-f). In contrast, a longer period of CIN (PLK4 induction with  
189 doxycycline for 4 weeks) shortened survival time further (median survival - 158 days vs.  
190 the 341 days in mice with 2 weeks of CIN), with a comparable frequency of thymic  
191 lymphomas (54% vs. 55% in mice with 2-weeks of CIN). Induction of CIN at a later age  
192 (100 days instead of 30 days old mice) yielded indistinguishable survival and tumor  
193 formation frequencies (Supplementary Figure 3g-i).

194 p53 knockout mice succumb to tumor formation within the first year of life (median survival  
195 of 176 days and 67.8% of examined mice had detectable tumors - Figure 3g-h), with a  
196 large proportion with thymic tumors (44.6% - Figure 3h). Following two weeks of  
197 doxycycline-induced CIN, PRG5 mice with p53 knockout developed a significantly higher  
198 number of tumors (91% - Figure 3h) of which 80.4% were of thymic origin. Survival was  
199 further decreased (median survival - 139 days - Figure 3g) relative to p53<sup>-/-</sup> mice due to  
200 the increased incidence of thymic lymphomas from which mice died at an earlier age  
201 (median survival of mice with thymic lymphomas – 134 and 154 days in doxycycline  
202 treated and control mice, respectively, Supplementary Figure 3j-l), similar to observations  
203 in Lck-Cre; Mad2f/f; p53f/f mice<sup>26</sup>. Tumor spectrum profiles were similar with the  
204 exception of increased thymic tumor proportion (Figure 3i). Finally, survival of PRG5  
205 mouse cohorts (either p53 knockout or heterozygote) with high frequency of thymic



206 lymphomas was comparable (Supplementary Figure 3m), suggesting that spontaneous  
207 tumor initiation in p53<sup>-/-</sup> mice occurs after weaning. In all cases examined thymic tumors  
208 were identified as lymphomas, of which many appeared invasive and metastatic  
209 (Supplementary Figure 3n, and Supplementary table 1).

### 210 **Transient CIN drives p53 loss and Myc overexpression**

211 RNA expression profiles of tumors and normal thymuses were determined to examine  
212 mechanism(s) underlying the conversion of normal tissue into spontaneous or  
213 doxycycline-induced thymic lymphomas. A general profile distinct from control normal  
214 thymus samples was identified for lymphomas (1325 differentially expressed genes  
215  $p < 0.05$ , Supplementary Figure 4a and Supplementary Table 2), with significant  
216 alterations in cell cycle and metabolic pathways (Supplementary Figures 4b and 5).  
217 Lymphomas from transient CIN in PRG5 p53<sup>+/-</sup> mice had low expression of Trp53  
218 (indicative of loss of the wild-type p53 allele), low expression of p53 target genes including  
219 Bcl2l1, and activation of p19 (Supplementary Figure 6a). Indeed, expression of p53 exons  
220 2-6 (the region deleted in the p53 null allele) was completely lost (Supplementary Figure  
221 6b)<sup>28</sup>. Whole genome DNA sequencing (X15 coverage) confirmed the loss of wild type  
222 *TRP53* gene exons 2-6 without evidence of other numerical or structural alterations in  
223 chromosome 11 (Supplementary Figure 6c-d) indicating whole-chromosome  
224 missegregation is the underlying mechanism.

225 Several common features were identified as hallmarks of advanced thymic lymphomas in  
226 PRG5 mice (p53<sup>-/-</sup> and p53<sup>-/-</sup> or p53<sup>+/-</sup> after transient CIN), including increased  
227 centrosome numbers (Supplementary Figure 7a) and overexpression of Myc RNA  
228 (Supplementary Figure 7b) and protein (Supplementary Figure 7c), potentially due to  
229 acquisition of additional chromosome 15 copies, an event more frequently observed in  
230 tumors from transient CIN (Supplementary Figure 7d).

### 231 **Transient CIN generates tumor initiating cells**

232 We hypothesized that acceleration of tumor formation following transient CIN might occur  
233 due to CIN enhancing generation of tumor initiating cells. To test this, we collected small  
234 biopsies (~2-3% of the tumor) from multiple tumors, as well as multi-focal biopsies from  
235 additional tumors and sequenced the beta chain of the T cell receptors (TCR $\beta$ ) found in



236 the tumor T cells (Figure 3j-k). Single biopsy analysis revealed that tumors forming after  
237 two-weeks of induced CIN had increased clone frequencies, with 1/5 tumors in p53 +/-  
238 mice and 6/6 tumors in p53-/- mice having more than one dominant clone (>1%  
239 frequency). In contrast, no tumors (0/6) from p53-/- mice without transient CIN had more  
240 than one dominant clone (Figure 3j and Supplementary Table 3). Transcriptomes  
241 generated by RNA sequencing confirmed the specifically increased expression of  
242 individual variable TCR $\beta$  genes in tumors from PRG5 mice (Supplementary Figure 8a),  
243 and also revealed increased clonal frequency in tumors from mice with Mad2 deletion  
244 (Supplementary Figure 8b).

245 Tumor clonality was more directly addressed in PRG5 mice by a collection of multi-  
246 regional biopsies representing different spatial regions of a tumor. TCR $\beta$  sequencing  
247 revealed 3/4 of CIN induced p53+/- and 3/4 of CIN induced p53-/- derived tumors in PRG5  
248 mice contained more than one dominant clone, whereas none of the spontaneous tumors  
249 from p53-/- mice contained more than one dominant clone (0/3) (Figure 3k and  
250 Supplementary Table 3). Tumors containing more than one TCR $\beta$  clone showed spatial  
251 separation of the different TCR $\beta$  receptors, consistent with independent tumorigenic  
252 events forming in parallel within the thymus (Figure 3k).

### 253 **Transient CIN accelerates clonal evolution of thymic lymphoma**

254 Since CIN drives random genomic reshuffling and generates higher tumor initiating cells  
255 (Figure 3j-k), transient CIN could be expected to generate tumors with diverse gene  
256 expression profiles. However, this was not the case: transcriptomes of independent  
257 tumors formed in PRG5 mice following transient CIN were found to share a similar gene  
258 expression profile whereas spontaneous tumors in p53-/- mice were more heterogenous  
259 (Supplementary Figure 9a-b). Whole genome sequencing of independent tumors  
260 revealed common chromosome gains in tumors forming after transient CIN (Figure 4 and  
261 Supplementary Figure 9c), with increases in chromosomes 4, 5, 14, and 15. RNA  
262 expression levels confirmed the apparent changes in chromosome copy numbers  
263 (Supplementary Figure 9d).

264 Multifocal tumor analyses showed little DNA variation among different tumor regions in  
265 spontaneous p53-/- thymic lymphomas of PRG5 mice; however, tumors driven by

266 transient CIN showed clear clonal DNA differences, correlating well with RNA expression  
267 and TCR sequencing data (Supplementary Figure 10a-c). Multifocal biopsy RNA  
268 expression analyses revealed high correlation between tumors driven by transient CIN,  
269 in contrast to the more heterogeneous spontaneous p53<sup>-/-</sup> tumors (Supplementary Figure  
270 10d).

271 Use of the Genomic Identification of Significant Targets in Cancer (GISTIC) algorithm to  
272 determine the most significant chromosomal events in advanced tumor groups  
273 (spontaneous, Plk4-transient CIN induced, and Mad2-chronic CIN induced thymic  
274 lymphomas) revealed chromosomes 4, 5, 12, 14, and 15 to be significantly increased  
275 (qValue=0.01). A similarity test (see Methods) of individual tumors to the GISTIC profile  
276 revealed that tumors forming following transient CIN had a higher similarity value to the  
277 GISTIC profile than the spontaneous p53<sup>-/-</sup> tumors (Figure 4 and Supplementary Table  
278 4). Thus, transient CIN (and chronic CIN to a lesser extent) accelerated the formation of  
279 a specific aneuploidy profile to which spontaneous tumors only displayed partial similarity.

### 280 **Aneuploidy profile selection occurs early in lymphoma development driven by** 281 **transient CIN**

282 Multifocal biopsy analysis of thymic lymphomas suggested that aneuploidy selection  
283 occurs early during tumor development (as different regions in the tumor present almost  
284 identical chromosome alterations and similar to the GISTIC profile) (Supplementary  
285 Figure 10). To critically test this, we used scWGS to determine the temporal dynamics of  
286 chromosome contents. Sequencing of early tumors (<500mg, with mice lacking any  
287 clinical signs such as weight loss or dyspnea) or late tumors (Supplementary Figure 11  
288 and Figure 5a) revealed that chromosome 4, 5, 14, and 15 gains in CIN-induced tumors  
289 (both early and late) were present in almost every cell. Consistent with early selection of  
290 an aneuploidy profile, this outcome contrasted with similar analyses of spontaneous  
291 tumors in p53<sup>-/-</sup> mice (Supplementary Figure 11). Early tumors forming following transient  
292 CIN showed a very high similarity to the GISTIC profile identified in late tumors, indicating  
293 that optimal tumorigenic clones form early under this condition, and in contrast to  
294 spontaneously formed tumors (p53<sup>-/-</sup> mice) and tumors forming under chronic CIN  
295 (Mad2<sup>-/-</sup> mice) (Figure 5a).

296 The most striking difference between genomes of tumors developed under chronic CIN  
297 or following transient CIN was the selection of chromosomes 4, 5, 14, and 15 gains  
298 apparently accumulating in single cells during early tumor development. Transient CIN-  
299 driven and spontaneous tumors showed significantly higher copy-number score (and  
300 higher aneuploidy) but lower copy-number score variability than chronic CIN driven  
301 tumors (Supplementary Figure 12). Using the Uniform Manifold Approximation and  
302 Projection (UMAP) algorithm, we determined the spatial distribution of high-dimensional  
303 data obtained from scWGS (Figure 5b). UMAP separated cell populations according to  
304 their tumor of origin (sample cell types were not given as an input - Figure 5b). A transition  
305 from euploid non-cancer cells to terminal tumors was observed, with early Mad2<sup>-/-</sup> tumors  
306 as well as p53<sup>-/-</sup> tumors containing cells within this spectrum. Plk4 driven tumors were  
307 localized with some p53<sup>-/-</sup> and terminal Mad2<sup>-/-</sup> tumors having spatial proximity. When  
308 marking the single cells with their respective GISTIC similarity score, UMAP separated  
309 single cells according to their similarity with a visible gradient from euploid cells to a  
310 cluster of cells with high similarity where both early and terminal Plk4 tumors localized.  
311 Thus, a very specific selection occurs in early tumors following transient CIN, a process  
312 which chronic CIN counteracts.

### 313 **Aneuploidy selection generates a gene expression profile of human cancers**

314 Gene expression analysis performed in correlation with the similarity index of each tumor  
315 in PRG5 mice (see Methods for detailed analysis pipeline plus Supplementary Figures 13  
316 and Supplementary Table 5) revealed significant enrichments of genes related to cell  
317 cycle progression and to pathways allowing cells to overcome oncogene-induced  
318 senescence and replication stress. This outcome raised the possibility that aneuploidy  
319 selection might provide higher tolerance to oncogene stress (due to overexpression of  
320 Myc, for example).

321 We examined the relevance of this proposed gene expression profile to what has been  
322 found in human cancers in the TCGA database (Supplementary Figure 14). This revealed  
323 that 11/24 of the cancers in this cohort substantially acquired a gene profile similar to that  
324 in tumors from transient CIN (Supplementary Figure 14a). This gene profile was highly  
325 correlated with increased MYC expression in 13/34 of the TCGA cancers (Supplementary  
326 Figure 14b) and was mutually exclusive between the two groups (with the exception of

327 four cancer types: LUAD, LUSC, STAD, and UCEC), indicating that some tumors develop  
328 this profile in general, and some only after Myc is overexpressed.

## 329 **Discussion**

330 In his prophetic monograph, Boveri laid the foundations for cancer research years to  
331 come<sup>29</sup>. In the current study, we tested Boveri's hypothesis suggesting that an abnormal  
332 chromosome content can lead to cancer. We find that a very short timeframe of CIN is  
333 sufficient to trigger tumor initiation and acceleration in p53 heterozygous and null mice,  
334 respectively. The fact that tumor latency in p53 heterozygous mice experiencing transient  
335 CIN at an early age is almost identical to spontaneous tumor formation in p53 null mice  
336 suggests that the events responsible for thymic lymphoma in p53 null mice occur at the  
337 same time frame in which we induced CIN. Nevertheless, we find it surprising that tumor  
338 burden was higher in CIN-induced p53 heterozygous mice, as loss of chromosome 11  
339 containing the wild type p53 gene is a prerequisite for thymic lymphoma formation in such  
340 mice. Considering that not all cells in the thymus lost the wild type p53 allele, this suggests  
341 that the rate of transformation of newly made p53 null cells is much higher in the CIN  
342 induced p53 heterozygous mouse, leading to multiple tumors forming.

343 We also found that p53 null mice experiencing transient CIN have accelerated onset of  
344 thymic lymphomas, at least partly due to increased clonal burden. Importantly, it was  
345 reported that thymic lymphomas in p53 null mice can form from more than one tumor  
346 initiating cell<sup>30</sup>, and our study shows that transient as well as chronic CIN drives this  
347 further. Tumors from both p53 heterozygous and null mice experiencing CIN at an early  
348 age show similar genomic landscape in which chromosomes 4, 5, 14, and 15 are gained.  
349 Strikingly, this genomic profile is in agreement with previous reports of thymic lymphomas  
350 in mice with Lck-Cre+ Mps1 mutation<sup>10</sup>, and also with thymic lymphomas derived from  
351 Mad2 knock out in this study and an earlier report<sup>26</sup>, although these works generate CIN  
352 through completely different mechanisms, and do so chronically.

353 In our multifocal biopsy DNA analyses, we found supporting evidence that the genomic  
354 landscape identified is found in a single cell, originating very early during tumor formation,  
355 as different regions in the tumor contain almost identical genome landscapes. Our data  
356 provides evidence for early and fast catastrophic aneuploid events already occurring

357 during the two-week induction of CIN, consistent with the idea of the ‘Big Bang’ model  
358 proposed for human breast and colon cancers<sup>31,32</sup>. We propose that it is in this timeframe  
359 that multiple optimal and sub-optimal tumorigenic cells form, and that the optimal clones  
360 contain the aforementioned genomic landscape which is detected also in the developed  
361 tumor. Intriguingly, we observe the same catastrophic aneuploid events emerging in  
362 developing Lck-Cre; Mad2; p53 tumors, however they appear to struggle reaching the  
363 optimal karyotype, probably due to the constant CIN pressure, highlighting transient CIN  
364 as a more efficient driver of tumorigenesis.

365 Our data are also in agreement with data showing that aneuploidy is not well tolerated in  
366 normal cells<sup>13,14</sup> as in thymic tissue it disappears after removing CIN. In p53 null mice  
367 spontaneously developing thymic lymphomas, a similar genomic landscape appears to  
368 be forming through an extended trial and error of ongoing clonal evolution, and probably  
369 given time, or examination of enough tumors (as the case of the multifocal biopsy from  
370 one of these mice, see Supplementary Figure 10), such a genomic landscape would  
371 appear. We present evidence for tissue specific aneuploidy profile that optimizes  
372 malignant transformation and propose that such optimal genomic landscapes exist for  
373 each tissue and cell type, with evidence for this already seen through our knowledge of  
374 recurrent chromosome abnormalities and of the involvement of chromosome  
375 instability<sup>26,33,34</sup>. Importantly, thymic lymphomas forming in developmentally arrested  
376 RAG2 deficient cells present a completely different genomic landscape lacking gains of  
377 chromosomes 1/4/5/14/15 but containing a unique rearrangement of chromosome 9qA4-  
378 5.3<sup>35</sup>, suggesting that even within the same tissue context, cancer genome evolution is  
379 also dependent on the genetic background of the cell. Our work shows that clonal  
380 evolution is operative in the development of thymic lymphoma and is accelerated under  
381 transient CIN.

## 382 **Acknowledgments**

383 This work was funded by a grant from the US National Institutes of Health (R35  
384 GM122476 to D.W.C.). D.W.C. receives salary support from the Ludwig Institute for  
385 Cancer Research. We thank Andrew Shiau for providing access to the CQ1 spinning disk  
386 confocal system. We thank Dr. Nissi Varki (University of California at San Diego  
387 Pathology Core) for histology sample analysis. We thank Kristen Jepsen from the UC San

388 Diego IGM Genomics Center for help with whole genome DNA sequencing (National  
389 Institutes of Health SIG grant #S10 OD026929). We thank Stefan Kessler with help  
390 uploading the raw sequencing data to public databases.

### 391 **Author contributions**

392 O.S. and D.W.C. conceived the project and wrote the manuscript. O.S. designed,  
393 performed, and analyzed the experiments. B.B. performed and analyzed the experiments  
394 related to samples from the Mad2 mouse cohort. Y.W. assisted in maintaining the Plk4  
395 mouse cohort and helped with breeding and samples collections. D.H.K. assisted with  
396 live cell imaging. M.M. helped with tumor sample processing and imaging. M.A.D. helped  
397 with sample processing for RNA expression analysis. J.A. helped with maintenance of  
398 Plk4 mouse colony, and with RNA library preparation for RNA sequencing. O.Z. helped  
399 with analysis of Plk4 cohort RNA sequencing analysis. A.M., R.W., R.S., and K.F. helped  
400 analyzing RNA sequencing, whole-genome DNA sequencing, and single cell whole  
401 genome DNA sequencing analysis. D.C.J.S. helped preparing samples for single cell  
402 whole genome DNA sequencing. B.V. helped generating the Plk4 mouse cohort. All  
403 authors provided input on the manuscript and D.W.C., F.F., and O.S. supervised all  
404 aspects of the work.

### 405 **Competing interests**

406 The authors declare no competing interests.

407

408

409

410

411

412

413

414

415

416



## 417 **Methods**

### 418 **Cell culture**

419 Mouse embryonic fibroblasts (MEFs) were derived as previously described<sup>36</sup>. Briefly,  
420 E13.5 embryos were washed with PBS and head, liver, and tail were removed. Embryos  
421 were minced in 0.05% trypsin (Gibco) and incubated in 37°C for 15 minutes. Dissociated  
422 cells were plated in DMEM media (Gibco) supplemented with 15% fetal bovine serum  
423 (Omega Scientific), 50µg/ml penicillin and streptomycin (Gibco), 2mM L-glutamine  
424 (Gibco), 1µM 2-mercaptoethanol (Sigma), 1mM sodium pyruvate (Gibco), and 0.1mM  
425 non-essential amino acids (Gibco). Cells were maintained at 37°C, 5% CO<sub>2</sub>, and 3% O<sub>2</sub>.  
426 Doxycycline (Sigma) was dissolved in water and used at a final concentration of 1µg/ml.  
427 Thymic lymphoma cells were derived as previously described<sup>37</sup>. Briefly, dissected tumors  
428 were dissociated using bent needles, and cells were plated in RPMI 1640 with 25 mM  
429 HEPES, 200 mM L-glutamine (Lonza), and supplemented with 10% fetal bovine serum  
430 (Hyclone), 1% penicillin and streptomycin (Gibco), 1% non-essential amino acids (Gibco),  
431 and 55mM 2-mercaptoethanol (Sigma).

### 432 **Mice**

433 Generation of doxycycline inducible Plk4 mouse with the tetracycline responsive Plk4-  
434 YFP gene inserted downstream of the Col1a1 locus and the M2-rtTA gene inserted into  
435 the ROSA locus was previously described<sup>23</sup>. To generate the PRG5 mice, Plk4 inducible  
436 mice were crossed with centrin-GFP mice<sup>27</sup> and with mice carrying a knockout allele of  
437 p53<sup>28</sup>. Mice homozygous for the Plk4 transgene and for the M2-rtTA gene and  
438 heterozygous for p53 were crossed with mice homozygous for centrin-GFP and  
439 heterozygous for p53 Mad2 to generate cohort mice heterozygous for Plk4, M2-rtTA, and  
440 centrin-GFP, and homozygous or heterozygous for p53. Doxycycline was administered  
441 for indicated times through mouse diet containing 0.625 g/Kg Doxycycline Hyclate  
442 (Envigo, TD.08541). Genotyping performed on tail DNA was done using the following  
443 primers: Plk4-YFP - CACAGGAACAGGCGTCTCTTCAAGTC and  
444 GTGCAGATGAACTTCAGGGTCAGCTTG; rtTA - AGGAGCATCAAGTAGCAAAGAG  
445 and AAGAGCGTCAGCAGGCAGCA; centrin-GFP -  
446 GACAAGCAGAAGAACGGCATCAAGGTG and CTTGCTTCTGATCCTCAGTGAGCTC;



447 p53 - ACAGCGTGGTGGTACCTTAT and TATACTCAGAGCCGGCCT and  
448 TCCTCGTGCTTTACGGTATC; Rosa - AAAGTCGCTGAGTTGTTAT and  
449 GCGAAGAGTTTGTCTCAACC and GGAGCGGGAGAAATGGATATG; Col1a1 -  
450 CCAGCTTCACCAGTTCAATCATCC and CAGTCCCTGTTTCTGCTGCTTGAATC. Mice  
451 were housed and cared for in an Association for the Assessment and Accreditation of  
452 Laboratory Animal Care-accredited facility, and all animal experiments were conducted  
453 in accordance with Institutional Animal Care and Use Committee-approved protocols.  
454 Lck-Cre; Mad2f/f; p53f/f mice were previously described<sup>26</sup>. Genotyping of Lck-Cre;  
455 Mad2f/f; p53f/f mice was performed as described previously<sup>26</sup>. Mice were housed and  
456 experiments were conducted according to Dutch law and approved by the Central  
457 Committee Animal experiments (CCD, permit AVD105002016465). Tissue sections from  
458 formalin fixed paraffin embedded (FFPE) tissues and from cryopreserved tissues were  
459 collected as previously described<sup>22</sup>.

#### 460 **Centrosome enumeration**

461 Centrosomes visualized by the centrin-GFP marker in PRG5 derived mouse embryonic  
462 fibroblasts grown in chamber slides (ibidi) were imaged (1 $\mu$ M x 10, X40/1.35NA) using  
463 the DeltaVision elite system (Applied Precision). Centrosomes visualized by the centrin-  
464 GFP marker in in tissue cryosections were imaged (at 0.2 $\mu$ m Z-sections with a Nikon  
465 100 $\times$  APO TIRF 1.49 NA objective) using the Nikon A1 scanning confocal microscope  
466 operated with NIS-Elements (Nikon).

#### 467 **Live cell imaging**

468 PRG5 derived mouse embryonic fibroblasts were seeded in 96-well in CELLSTAR  $\mu$ Clear  
469 96-well plate (Greiner bio-one). Cells were stained with DNA SiR (Spirochrome) and three  
470 hours later were imaged using a CQ1 spinning disk confocal systems (Yokogawa Electric  
471 Corporation) with a x40 magnification at 37°C and 5% CO<sub>2</sub>. To induce Plk4  
472 overexpression, doxycycline (Sigma, 1 $\mu$ g/ml) was added 1 hour prior to imaging. Live  
473 imaging of 8  $\times$  3- $\mu$ m z-sections was conducted for 24 hours. Image acquisition and data  
474 analysis were performed using CQ1 software and ImageJ, respectively. For time lapse  
475 imaging of Lck-Cre Mad2f/f p53 T-ALL cells, primary T-ALL derived cell lines were  
476 transduced with H2B-Cherry using retroviral transduction as described previously<sup>38</sup>,

477 cultured in LabTek imaging chambers (Nunc) and imaged on a DeltaVision Elite  
478 microscope (Applied Precision). Mitotic abnormalities were quantified by manual  
479 inspection of the movies.

#### 480 **Quantitative real-time PCR**

481 RNA from PRG5 derived mouse embryonic fibroblasts was extracted using the  
482 Nucleospin RNA kit (Macherey Nagel). Mouse tissues were homogenized using a  
483 mechanical tissue homogenizer in Trizol reagent (Invitrogen) and RNA was extracted  
484 according to the manufacturer guidelines. cDNA was prepared from 1 µg total RNA using  
485 the high-capacity reverse transcription kit (ABI) according to the manufactures'  
486 instructions. Quantitative real-time PCR was done in triplicates, using iTaq Universal  
487 SYBR green (Bio-Rad) and a CFX384 real-time PCR machine. For detection of Plk4, the  
488 following primers were used – GGAGAGGATCGAGGACTTTAAGG and  
489 CCAGTGTGTATGGACTCAGCT. The following primers were used as house-keeping  
490 control genes – Rsp9 – GACCAGGAGCTAAAGTTGATTGGA and  
491 GCGTCAACAGCTCCCGGGC; Actg1 – TGGATCAGCAAGCAGGAGTATG and  
492 CCTGCTCAGTCCATCTAGAAGCA.

#### 493 **Protein analysis**

494 Total protein from PRG5 mouse tissues (10mg biopsies) were extracted in 500µL X2  
495 Laemmli sample buffer and 10µL from each sample was loaded in 10% acrylamide gel  
496 for SDS/PAGE separation. Proteins were transferred to a nitrocellulose membrane,  
497 blocked with 5% milk in tris-buffered saline and 0.1% Tween-20 (TBS-T), and incubated  
498 overnight with the following primary antibodies: anti-GAPDH (cell signaling, #2118,  
499 1:10,000), Myc (Abcam, ab32072, 1:1,000). Immunoblots were washed with TBS-T and  
500 incubated with HRP-conjugated secondary antibodies (GE Healthcare, 1:5,000) for one  
501 hour in room temperature before development in films. For quantification of mitotic cells,  
502 cultured T-ALL cells were exposed to nocodazole (Sigma) or DMSO (Sigma) for 6 hours  
503 fixated in 70% ethanol, washed with PBS and blocked in blocking buffer (0.05% Tween  
504 (Sigma)/ 2% BSA (Sigma) in PBS) and stained with FITC-conjugated MPM2 antibody  
505 (Upstate) for 2 hours. Cells were washed in PBS and resuspended in staining buffer to  
506 label DNA was stained using. FACS staining buffer (20 ug/ml propidium iodide (Sigma),

507 0.2 mg/ml RNaseA (Sigma) in PBS). Cells were analyzed on a FACSCanto analyzer (BD)  
508 and quantified using FlowJo software (BD).

### 509 **Single cell whole genome DNA sequencing**

510 Single cells from mouse thymuses and thymic tumors were isolated using flow cytometry  
511 sorting and prepared for sequencing as previously described<sup>26</sup>. Sequencing was  
512 performed using a NextSeq 500 machine (Illumina; up to 51, 77 or 84 cycles; single end).  
513 The generated data were subsequently demultiplexed using sample-specific barcodes  
514 and changed into fastq files using bcl2fastq (Illumina; version 1.8.4). Reads were  
515 afterwards aligned to the mouse reference genome (GRCm38/mm10) using Bowtie2  
516 (version 2.2.4)<sup>39</sup>. Duplicate reads were marked with BamUtil (version 1.0.3)<sup>40</sup>. The aligned  
517 read data (bam files) were analyzed with AneuFinder (Version 1.14.0)<sup>41</sup>. Following GC  
518 correction and blacklisting of artefact-prone regions (extreme low or high coverage in  
519 control samples), libraries were analyzed using the dnacopy and edivisive copy number  
520 calling algorithms with variable width bins (binsize: 1 Mb; stepsize: 500 kb) and breakpoint  
521 refinement (R= 20, confint = 0.95; other settings as default). Results were afterwards  
522 curated by requiring a minimum concordance of 95% between the results of the two  
523 algorithms. Libraries with less than five reads per bin per chromosome copy (~ 25,000  
524 reads for a diploid genome) were discarded. AneuFinder gave unexpected results for  
525 sample P309. About half of the libraries showed an average copy number of 1.5 and the  
526 other half an average copy number of 3 (two times as high). Examination of the model  
527 results showed poor fits for the first group of libraries. Sample P309 was therefore  
528 reanalysed with the developer version of AneuFinder (Version 1.7.4; from GitHub) using  
529 a minimum ground ploidy of 2.5 (min.groun.plody=2.5) and a maximum ground ploidy of  
530 3.5 (max.ground.ploidy=3.5). Results were subsequently curated as described above. As  
531 a final step, breakpoints that were located within 5 Mb from each other (across libraries)  
532 were grouped and centered using custom made R functions (R version 3.6.3,  
533 <https://www.R-project.org/>) to prevent the heterogeneity scores to reach unlikely high  
534 values just because breakpoints are off by a few bins.

535

536

## 537 **Genome-wide karyotype measures**

538 Copy number change score (CN change score): For each cell this is calculated as the  
539 average absolute difference between the observed copy number of each bin and the  
540 expected copy number of each bin (euploid genome). Bins have variable width and  
541 therefore a weighted average was used. The score of the sample is calculated as the  
542 average score of all cells. Heterogeneity score: For each bin this is calculated as the  
543 proportion of all pairwise comparisons (Cell 1 vs. Cell 2, Cell 1 vs. Cell 3, etc.; Total  
544 number =  $n*(n-1) / 2$ ) that show differences in copy number. The score of the sample is  
545 calculated as the average score of all bins. Mean number of transitions per Mb (Structural  
546 score): For each cell this has been calculated as the total number of transitions (or  
547 breakpoints) divided by the total genome length (sum of bin widths). The score of the  
548 sample is calculated as the average score of all cells.

## 549 **Uniform Manifold Approximation and Projection (UMAP)**

550 The UMAP function of the R package umap (version 0.2.6.0; from published preprint:  
551 Leland McInnes, John Healy, James Melville (2020). UMAP: Uniform Manifold  
552 Approximation and Projection for Dimension Reduction. ArXiv 1802.03426.) was used to  
553 compute the manifold approximation and projection of all single cell DNA sequencing  
554 samples described in this paper (Figure 1b - d, Figure 2h, j, l and Supplementary Figure  
555 11; Arguments: random\_state=1, n\_neighbors=50, min\_dist=0.9999). A matrix containing  
556 the copy number calls of the 1 Mb bins of the autosomes of all samples was used as  
557 input. Chromosome X was excluded due to differences in gender.

## 558 **DNA fluorescent in-situ hybridization (FISH)**

559 Dissociated splenic and thymic cells were fixed using methanol/acetic acid (3:1), washed  
560 with fixative three times, and kept in fixative at -20 °C until use. To make custom Trp53  
561 BAC probes, the following BACs were ordered from bacpac  
562 (<https://bacpacresources.org/>): RP24-285L20 and RP23-243M15. BACs were isolated  
563 from 50ml bacterial cultures using the BACMAX Bac extraction kit (Epicentre). Isolated  
564 BACs were sonicated (x10 cycles of 15 seconds 'on' 45 seconds 'off' at constant intensity  
565 with power set to '3', Branson sonifier 450) and labeled with TM-rhodamine Label-IT  
566 (Mirus). Labeled BAC probes were suspended in commercial chromosome paint probe

567 for chromosome 11 (Metasystems). DNA-FISH was performed by applying probes onto  
568 samples and covering with a glass coverslip. Genomic DNA and probes were co-  
569 denatured at 75 °C for 2 minutes by placing slide on pre-heated metal plate. Samples  
570 were hybridized overnight at 37 °C in a dark humidified chamber. Slides were  
571 subsequently washed with 0.4× SSC at 72 °C for 2 min and rinsed in 2× SSC, 0.05%  
572 Tween-20 at room temperature for 30 s. Slides were then rinsed in PBS, counterstained  
573 with DAPI, and mounted using pro-long gold (Invitrogen). FISH images were acquired on  
574 a DeltaVision elite system (Applied Precision) at ×40 magnification (10 × 0.5 μm z-  
575 sections). Maximum intensity projections were generated using the softWoRx program.

### 576 **Preparation of DNA/RNA from tissue biopsies for sequencing**

577 Tissues were snap frozen in liquid nitrogen and kept in -80 °C. Biopsies were taken from  
578 frozen tissues placed on a -80 °C chilled metallic stage. Stage and tools were cleaned  
579 between different tissues and biopsies to minimize cross contamination of DNA and RNA.  
580 Biopsies were homogenized using QIAshredder (Qiagen) and DNA/RNA were prepared  
581 using the AllPrep DNA/RNA Mini Kit (Qiagen) according the manufacturer guidelines.

### 582 **TCR sequencing**

583 TCR libraries were prepared using immunoSEQ kit mmTCRB according to the user  
584 manual (Adaptive biotechnologies). TCR libraries were sequenced using illumina  
585 Nextseq 500 (DNA Link facility), and TCR sequences were analyzed using the  
586 immunoSEQ Analyzer platform (Adaptive biotechnologies). Rare sequences (found at  
587 less than 1%) with 100% identity to dominant sequences were filtered and are marked in  
588 Supplementary table 3.

### 589 **Whole genome DNA sequencing (WGS)**

590 Library Preparation: 450 nanograms of Genomic DNA from each sample was fragmented  
591 by Adaptive Focused Acoustics (E220 Focused Ultrasonicator, Covaris, Woburn,  
592 Massachusetts) to produce an average fragment size of 350 basepairs (bp). Fragmented  
593 DNA was purified using the Agencourt AMPure XP beads (Beckman Coulter, Fullerton,  
594 CA, USA) and sequencing libraries were generating using the KAPA Hyper Prep Kit  
595 (KAPA Biosystems, Wilmington, MA, USA) following manufacturer's instructions using 4

596 cycles of amplification. The quality of the library was assessed using High Sensitivity  
597 D1000 kit on a 2200 TapeStation instrument (Agilent Technologies, Santa Clara, CA,  
598 USA). Sequencing was performed using the NovaSeq 6000 Sequencing System  
599 (Illumina, San Diego, CA, USA), generating 150 bp paired-end reads to obtain 10X  
600 coverage.

## 601 **RNA sequencing**

602 cDNA libraries were prepared using the TruSeq Stranded mRNA Sample Preparation Kit  
603 (Illumina) according to the manufacturer guidelines. Then, cDNA libraries were  
604 sequenced on an Illumina HiSeq 4000 using single read, 50 cycle runs. FASTQ files were  
605 processed to assess quality by determining general sequencing bias, clonality and  
606 adapter sequence contamination. RNA sequencing reads were aligned to the mm10  
607 mouse reference genome using STAR<sup>42</sup>. Gene expression levels TPM and raw counts  
608 were calculated by using RSEM<sup>43</sup>. The  $\log_2(\text{TPM})$  values of selected TRBV transcripts  
609 were shown in a heatmap where the blue color stands for low expression while red for  
610 high expression. The heatmap is generated by 'pheatmap' package for the R program (R  
611 Core Team (2020). R: A language and environment for statistical computing. R  
612 Foundation for Statistical Computing, Vienna, Austria. URL <https://www.R-project.org/>).

## 613 **GISTIC 2.0 Similarity Index**

614 CNVkit was used to determine DNA copy number from tumor WGS. We executed GISTIC  
615 2.0 broad-level analysis using CNVkit segment files as input. Amplifications and deletions  
616 with  $q < 0.01$  were kept, leaving chr 4,5,12,14,15 as significant amps. Segments were  
617 binned into 100,000 bp bins, each keeping their respective segment mean. Bin value z-  
618 scores were applied to the dataset, followed by an ecdf function. The resulting measure  
619 was then subtracted from 1 to create a "similarity index", indicating a similarity to the  
620 "optimal clone" which is described by significantly amplified regions.

## 621 **CNV Heatmaps**

622 R Bioconductor package ComplexHeatmap was used to plot the broad-level gistic results  
623 from the file "broad\_values\_by\_arm.txt".

624



## 625 **RNA-seq vs Normal Thymus**

626 The R Bioconductor packages edgeR and limma were used to implement the limma-voom  
627 method for differential expression analysis. Lowly expressed genes were removed and  
628 then trimmed mean of M-values (TMM) normalization was applied. The experimental  
629 design was modeled upon experimental treatment of tumors (~0 + Treatment). The voom  
630 method was employed to model the mean-variance relationship in the log-cpm values,  
631 after which lmFit was used to fit per-gene linear models and empirical Bayes moderation  
632 was applied with the eBayes function.

## 633 **RNA-Seq using GISTIC 2.0 index as covariate**

634 Samples' similarity indices were used as continuous covariates in the RNAseq gene  
635 expression analysis using the limma-voom method to determine genes who's expression  
636 significantly correlates with the similarity index. The experimental design was modeled  
637 upon the gistic index and batch (~gistic+batch).

## 638 **Data availability**

639 RNA sequencing is deposited in the Gene Expression Omnibus (GEO) database,  
640 accession number GSE161728 (currently in private status). Whole-genome DNA  
641 sequencing is deposited in the Sequence Read Archive (SRA) database (currently in  
642 private status). Single-cell whole-genome sequencing is deposited in the European  
643 Nucleotide Archive (ENA) accession number PRJEB41176.

644

645

646

647

648

649

650

651



## 652 References

- 653 1. Hansemann, D. Ueber asymmetrische Zelltheilung in Epithelkrebsen und deren  
654 biologische Bedeutung (On the asymmetrical cell division in epithelial cancers and  
655 its biological significance). *Archiv f. pathol. Anat.*, 299-326 (1890).
- 656 2. Hanahan, D. & Weinberg, R.A. Hallmarks of cancer: the next generation. *Cell* **144**,  
657 646-74 (2011).
- 658 3. Taylor, A.M. *et al.* Genomic and Functional Approaches to Understanding Cancer  
659 Aneuploidy. *Cancer Cell* **33**, 676-689 e3 (2018).
- 660 4. Stopsack, K.H. *et al.* Aneuploidy drives lethal progression in prostate cancer. *Proc*  
661 *Natl Acad Sci U S A* **116**, 11390-11395 (2019).
- 662 5. Boveri, T. Uber mephrolige Mitosen als Mittel zur Analyse des Zellkerns (On  
663 multipolar mitosis as a means of analysis of the cell nucleus). *Verhandl. Physik.-*  
664 *medizinische Gesellschaft zu Wurzburg. Neue Folge* 67-90 (1902).
- 665 6. Naylor, R.M. & van Deursen, J.M. Aneuploidy in Cancer and Aging. *Annu Rev*  
666 *Genet* **50**, 45-66 (2016).
- 667 7. Gordon, D.J., Resio, B. & Pellman, D. Causes and consequences of aneuploidy in  
668 cancer. *Nat Rev Genet* **13**, 189-203 (2012).
- 669 8. Weaver, B.A., Silk, A.D., Montagna, C., Verdier-Pinard, P. & Cleveland, D.W.  
670 Aneuploidy acts both oncogenically and as a tumor suppressor. *Cancer Cell* **11**,  
671 25-36 (2007).
- 672 9. Baker, D.J., Jin, F., Jeganathan, K.B. & van Deursen, J.M. Whole chromosome  
673 instability caused by Bub1 insufficiency drives tumorigenesis through tumor  
674 suppressor gene loss of heterozygosity. *Cancer Cell* **16**, 475-86 (2009).
- 675 10. Foijer, F. *et al.* Chromosome instability induced by Mps1 and p53 mutation  
676 generates aggressive lymphomas exhibiting aneuploidy-induced stress. *Proc Natl*  
677 *Acad Sci U S A* **111**, 13427-32 (2014).
- 678 11. Storchova, Z. & Pellman, D. From polyploidy to aneuploidy, genome instability and  
679 cancer. *Nat Rev Mol Cell Biol* **5**, 45-54 (2004).
- 680 12. Shoshani, O. *et al.* Polyploidization of murine mesenchymal cells is associated  
681 with suppression of the long noncoding RNA H19 and reduced tumorigenicity.  
682 *Cancer Res* **72**, 6403-13 (2012).

- 683 13. Sheltzer, J.M. *et al.* Single-chromosome Gains Commonly Function as Tumor  
684 Suppressors. *Cancer Cell* **31**, 240-255 (2017).
- 685 14. Santaguida, S. & Amon, A. Short- and long-term effects of chromosome mis-  
686 segregation and aneuploidy. *Nat Rev Mol Cell Biol* **16**, 473-85 (2015).
- 687 15. Silk, A.D. *et al.* Chromosome missegregation rate predicts whether aneuploidy will  
688 promote or suppress tumors. *Proc Natl Acad Sci U S A* **110**, E4134-41 (2013).
- 689 16. Bettencourt-Dias, M. *et al.* SAK/PLK4 is required for centriole duplication and  
690 flagella development. *Curr Biol* **15**, 2199-207 (2005).
- 691 17. Habedanck, R., Stierhof, Y.D., Wilkinson, C.J. & Nigg, E.A. The Polo kinase Plk4  
692 functions in centriole duplication. *Nat Cell Biol* **7**, 1140-6 (2005).
- 693 18. Holland, A.J., Lan, W., Niessen, S., Hoover, H. & Cleveland, D.W. Polo-like kinase  
694 4 kinase activity limits centrosome overduplication by autoregulating its own  
695 stability. *J Cell Biol* **188**, 191-8 (2010).
- 696 19. Ganem, N.J., Godinho, S.A. & Pellman, D. A mechanism linking extra centrosomes  
697 to chromosomal instability. *Nature* **460**, 278-82 (2009).
- 698 20. Lopes, C.A.M. *et al.* Centrosome amplification arises before neoplasia and  
699 increases upon p53 loss in tumorigenesis. *J Cell Biol* **217**, 2353-2363 (2018).
- 700 21. Basto, R. *et al.* Centrosome amplification can initiate tumorigenesis in flies. *Cell*  
701 **133**, 1032-42 (2008).
- 702 22. Vitre, B. *et al.* Chronic centrosome amplification without tumorigenesis. *Proc Natl*  
703 *Acad Sci U S A* **112**, E6321-30 (2015).
- 704 23. Levine, M.S. *et al.* Centrosome Amplification Is Sufficient to Promote Spontaneous  
705 Tumorigenesis in Mammals. *Dev Cell* **40**, 313-322 e5 (2017).
- 706 24. Coelho, P.A. *et al.* Over-expression of Plk4 induces centrosome amplification, loss  
707 of primary cilia and associated tissue hyperplasia in the mouse. *Open Biol* **5**,  
708 150209 (2015).
- 709 25. Sercin, O. *et al.* Transient PLK4 overexpression accelerates tumorigenesis in p53-  
710 deficient epidermis. *Nat Cell Biol* **18**, 100-10 (2016).
- 711 26. Fojjer, F. *et al.* Deletion of the MAD2L1 spindle assembly checkpoint gene is  
712 tolerated in mouse models of acute T-cell lymphoma and hepatocellular  
713 carcinoma. *Elife* **6**(2017).

- 714 27. Hirai, M., Chen, J. & Evans, S.M. Generation and Characterization of a Tissue-  
715 Specific Centrosome Indicator Mouse Line. *Genesis* **54**, 286-96 (2016).
- 716 28. Jacks, T. *et al.* Tumor spectrum analysis in p53-mutant mice. *Curr Biol* **4**, 1-7  
717 (1994).
- 718 29. Boveri, T. Concerning the origin of malignant tumours by Theodor Boveri.  
719 Translated and annotated by Henry Harris. *J Cell Sci* **121 Suppl 1**, 1-84 (2008).
- 720 30. Dudgeon, C. *et al.* The evolution of thymic lymphomas in p53 knockout mice.  
721 *Genes Dev* **28**, 2613-20 (2014).
- 722 31. Gao, R. *et al.* Punctuated copy number evolution and clonal stasis in triple-  
723 negative breast cancer. *Nat Genet* **48**, 1119-30 (2016).
- 724 32. Sottoriva, A. *et al.* A Big Bang model of human colorectal tumor growth. *Nat Genet*  
725 **47**, 209-16 (2015).
- 726 33. Ben-David, U. & Amon, A. Context is everything: aneuploidy in cancer. *Nat Rev*  
727 *Genet* **21**, 44-62 (2020).
- 728 34. Sansregret, L. & Swanton, C. The Role of Aneuploidy in Cancer Evolution. *Cold*  
729 *Spring Harb Perspect Med* **7**(2017).
- 730 35. Bianchi, J.J., Murigneux, V., Bedora-Faure, M., Lescale, C. & Deriano, L.  
731 Breakage-Fusion-Bridge Events Trigger Complex Genome Rearrangements and  
732 Amplifications in Developmentally Arrested T Cell Lymphomas. *Cell Rep* **27**, 2847-  
733 2858 e4 (2019).
- 734 36. Putkey, F.R. *et al.* Unstable kinetochore-microtubule capture and chromosomal  
735 instability following deletion of CENP-E. *Dev Cell* **3**, 351-65 (2002).
- 736 37. Jinadasa, R. *et al.* Derivation of thymic lymphoma T-cell lines from *Atm*(*-/-*) and  
737 *p53*(*-/-*) mice. *J Vis Exp* (2011).
- 738 38. Foijer, F., Wolthuis, R.M., Doodeman, V., Medema, R.H. & te Riele, H. Mitogen  
739 requirement for cell cycle progression in the absence of pocket protein activity.  
740 *Cancer Cell* **8**, 455-66 (2005).
- 741 39. Langmead, B. & Salzberg, S.L. Fast gapped-read alignment with Bowtie 2. *Nat*  
742 *Methods* **9**, 357-9 (2012).
- 743 40. Jun, G., Wing, M.K., Abecasis, G.R. & Kang, H.M. An efficient and scalable  
744 analysis framework for variant extraction and refinement from population-scale  
745 DNA sequence data. *Genome Res* **25**, 918-25 (2015).

- 746 41. Bakker, B. *et al.* Single-cell sequencing reveals karyotype heterogeneity in murine  
747 and human malignancies. *Genome Biol* **17**, 115 (2016).
- 748 42. Dobin, A. *et al.* STAR: ultrafast universal RNA-seq aligner. *Bioinformatics* **29**, 15-  
749 21 (2013).
- 750 43. Li, B. & Dewey, C.N. RSEM: accurate transcript quantification from RNA-Seq data  
751 with or without a reference genome. *BMC Bioinformatics* **12**, 323 (2011).

752

753

754

755

756

757

758

759

760

761

762

763

764

765

766

767

768

769

Figure 1 | Aneuploidy evolution in thymic lymphomas under chronic CIN driven by deletion of Mad2

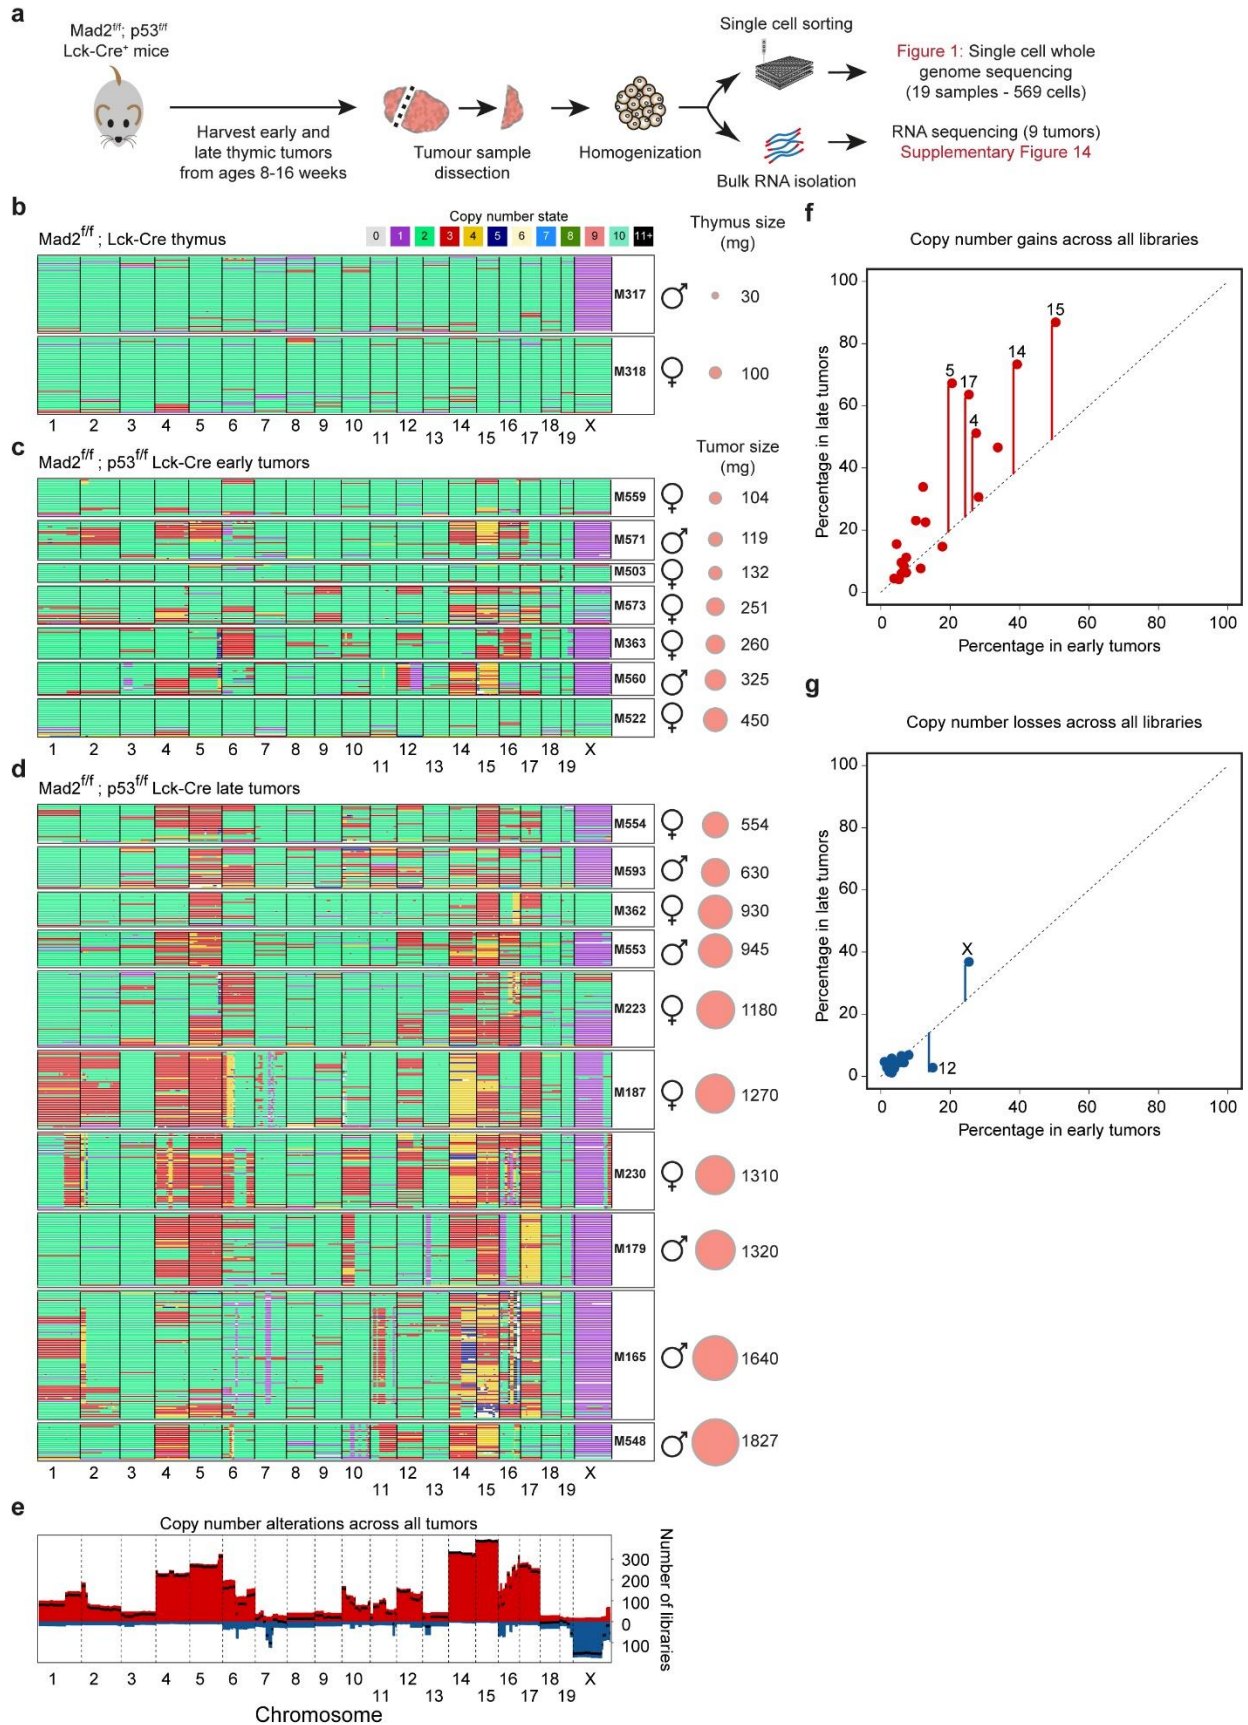

771 **Figure 1 | Aneuploidy evolution in thymic lymphomas under chronic CIN driven by**  
772 **deletion of Mad2.** (a) Overview of thymic tumors collection from Lck-Cre+; Mad2f/f; p53f/f  
773 mice sampled at 8-16 weeks of age. (b-d) Heatmaps showing DNA copy number using  
774 single cell whole-genome sequencing of tumor cells collected from (b) Lck-Cre+; Mad2f/f  
775 mice (c) Lck-Cre+; Mad2f/f; p53f/f mice with developing (early) tumors and (d) Lck-Cre+;  
776 Mad2f/f; p53f/f mice with terminal (late) tumors. Genomic position in order from  
777 chromosome 1 to X are in the x-axis and individual cells are in the y-axis. Colors indicate  
778 the copy number state as determined by AneuFinder. Data of samples M187 and M179  
779 was previously reported in Foijer et al. *elife*, 2017. Sample M165 is a new sequencing  
780 experiment of a sample also shown in Foijer et al. *elife*, 2017. (e) Genome-wide overview  
781 of cumulative copy number (1 Mb bins) gains (red) and losses (blue) across all thymic  
782 lymphomas presented in panels c-d. Black line presents the net change; difference  
783 between number of libraries with a copy number gain and the number of libraries with a  
784 copy number loss. (f-g) Comparison of copy number gains (f) and losses (g) between  
785 early and late tumors. Each dot represents one chromosome.

786

787

788

789

790

791

792

793

794

795

796

797



Figure 2 | Transient CIN in mice through induced Plk4 overexpression drives transient aneuploidy

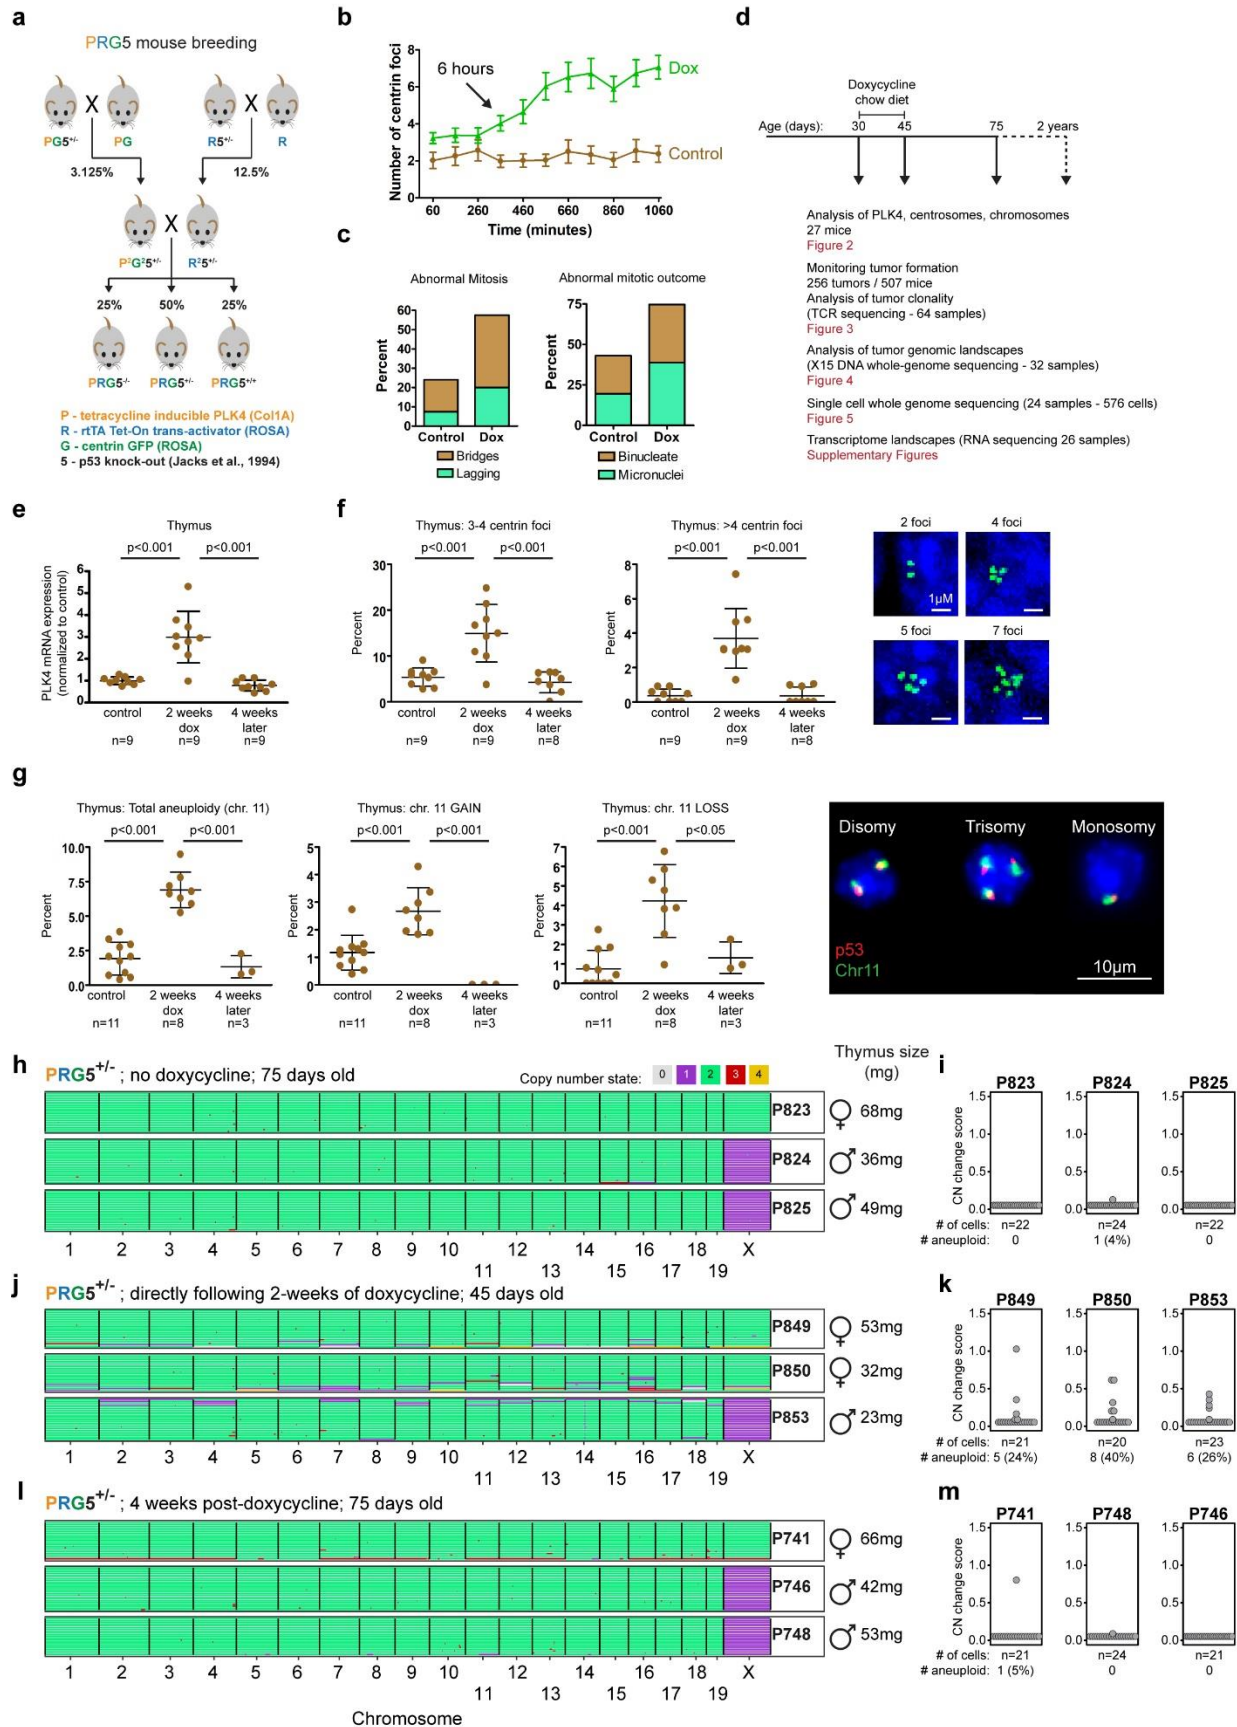



799 **Figure 2 | Transient CIN in mice through induced Plk4 overexpression drives**  
800 **transient aneuploidy.** (a) Breeding strategy used to obtain doxycycline-inducible Plk4  
801 mice with centrin-GFP and under different backgrounds of p53 (PRG5 mice). (b-c)  
802 Measurements of centrin-GFP foci (b, starting one hour following Plk4 induction, mean  $\pm$   
803 SD) and mitotic abnormalities (c, as observed starting 8 hours after Plk4 induction) in  
804 p53<sup>+/-</sup> PRG5 mouse embryonic fibroblasts using live cell imaging. (d) Overview of the  
805 experimental design using PRG5 mice. (e-g) Plk4 mRNA levels (e), measurement of  
806 centrin-GFP foci (f), and percent aneuploidy for chromosome 11 (using interphase DNA-  
807 FISH, g) in thymuses from PRG5 mice before (control) immediately after (2 weeks dox)  
808 and one month after (4 weeks later) doxycycline administration. Mean  $\pm$  SD of indicated  
809 mice per group are presented. \*p-values determined using one-way ANOVA with Tukey's  
810 Multiple Comparison Test. (h, j, l) Heatmaps showing DNA copy number using single cell  
811 whole-genome sequencing of cells collected from p53<sup>+/-</sup> PRG5 mice (h) before, (j)  
812 immediately after, and (l) one month after Plk4 induction. (i, k, m) Analysis of copy  
813 number changes of the samples on the left (panels h, j, and l). See methods for details  
814 about calculation of the CN (copy number) change score. Statistics below the dot plots  
815 indicate the total number and percentage of cells with at least one whole chromosome  
816 gain or loss.

817

818

819

820

821

822

823

824

825

826

Figure 3 | Transient CIN drives thymic lymphoma initiation in p53 deficient mice

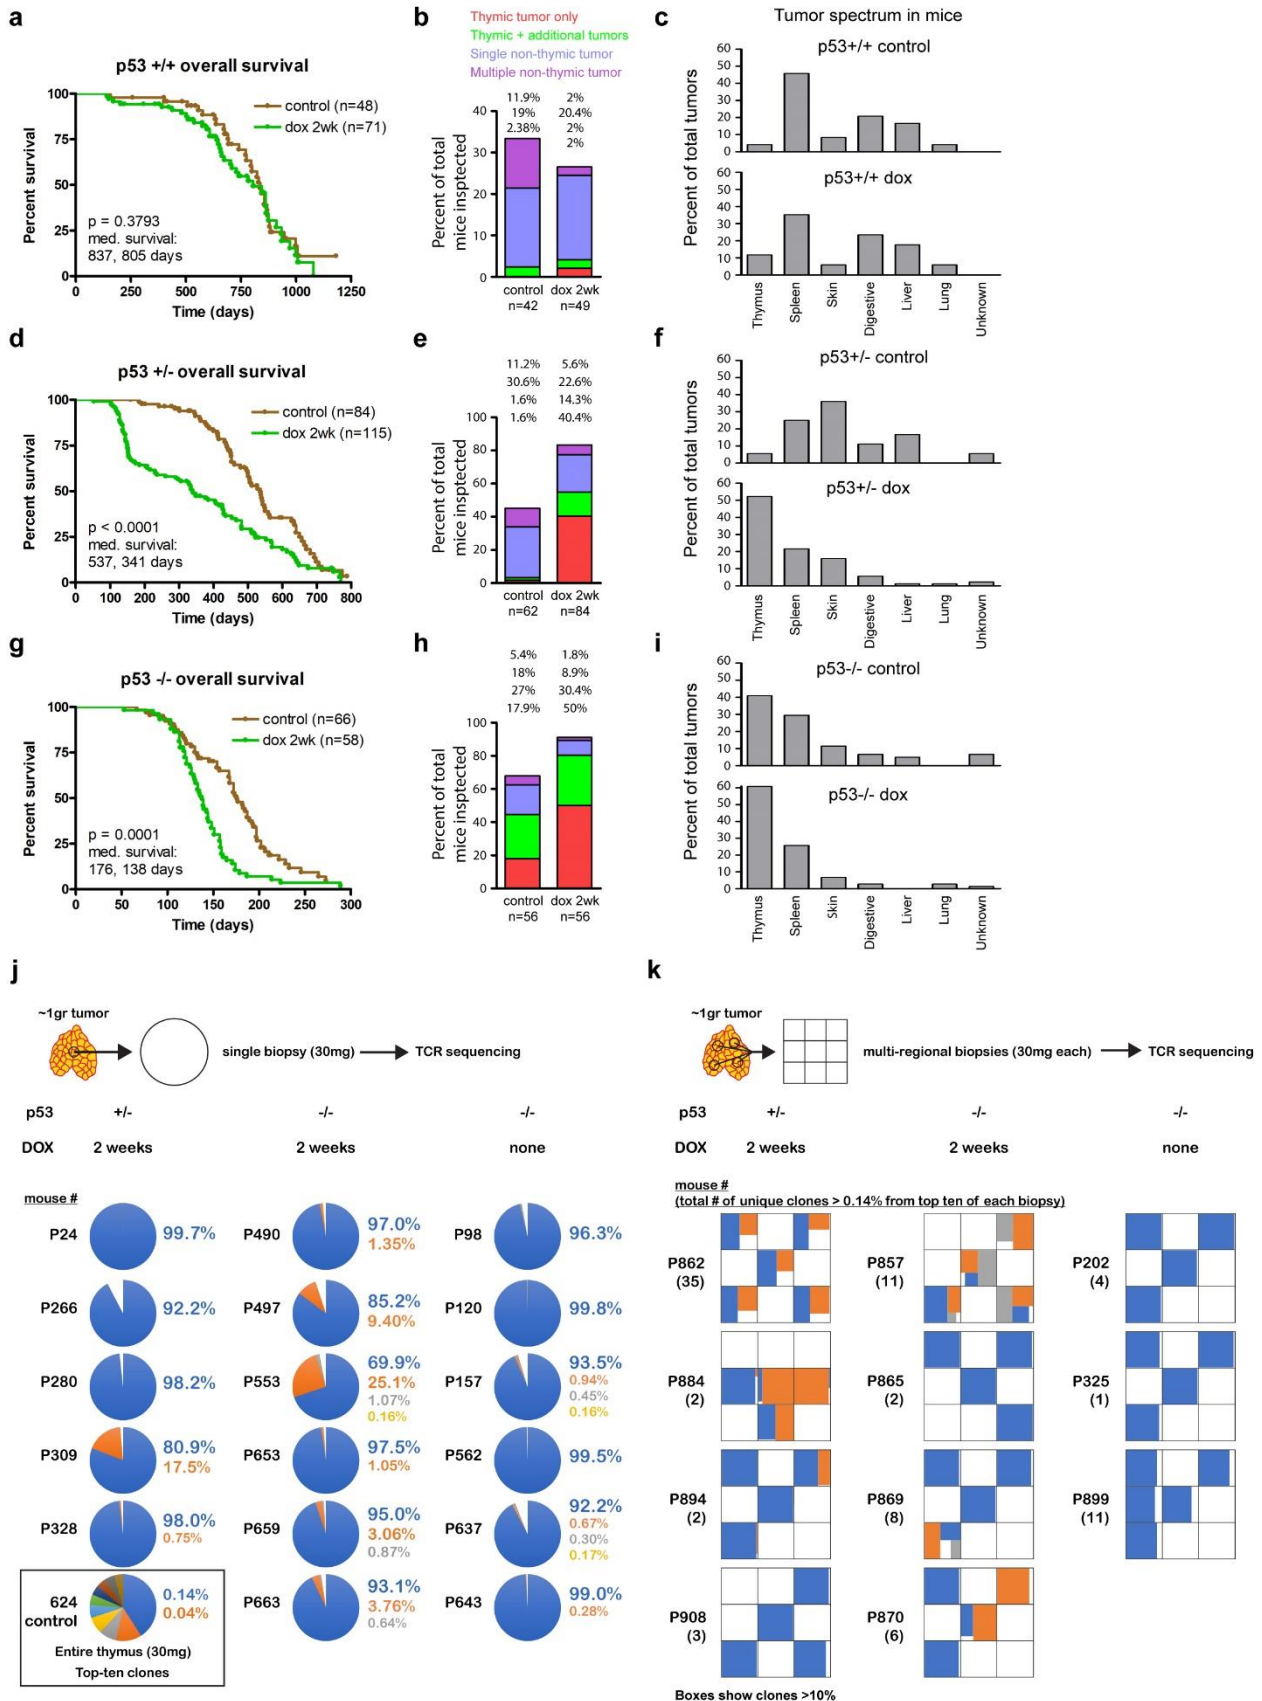

828 **Figure 3 | Transient CIN drives thymic lymphoma initiation in p53 deficient mice.**  
829 **(a, d, g)** Survival (Kaplan-Meier) plots of PRG5 mice treated with doxycycline for two  
830 weeks at the age of 30 days with **(a)** wild-type p53, **(d)** heterozygous p53, and **(g)** p53  
831 knock-out backgrounds. Comparison of indicated number of mice done using log rank  
832 test. **(b, e, h)** Thymic and non-thymic tumor frequencies of indicated number in PRG5  
833 mice treated with doxycycline for two weeks at the age of 30 days with **(b)** wild-type p53,  
834 **(e)** heterozygous p53, and **(h)** p53 knock-out backgrounds. **(c, f, i)** Distribution of tumor  
835 types from indicated number of tumors in PRG5 mice treated with doxycycline for two  
836 weeks at the age of 30 days with **(c)** wild-type p53, **(f)** heterozygous p53, and **(i)** p53  
837 knock-out backgrounds. **(j-k)** Top ten T cell receptor frequencies (indicative of T cell  
838 clones) in thymic T cell lymphomas from PRG5 mice in **(j)** single biopsies and **(k)** multi-  
839 regional biopsies as determined using T cell receptor sequencing. A control thymic  
840 sample (mouse #624) is presented in **j**.

841

842

843

844

845

846

847

848

849

850

851

852

853

Figure 4 | CIN accelerates the selection for a specific aneuploidy profile

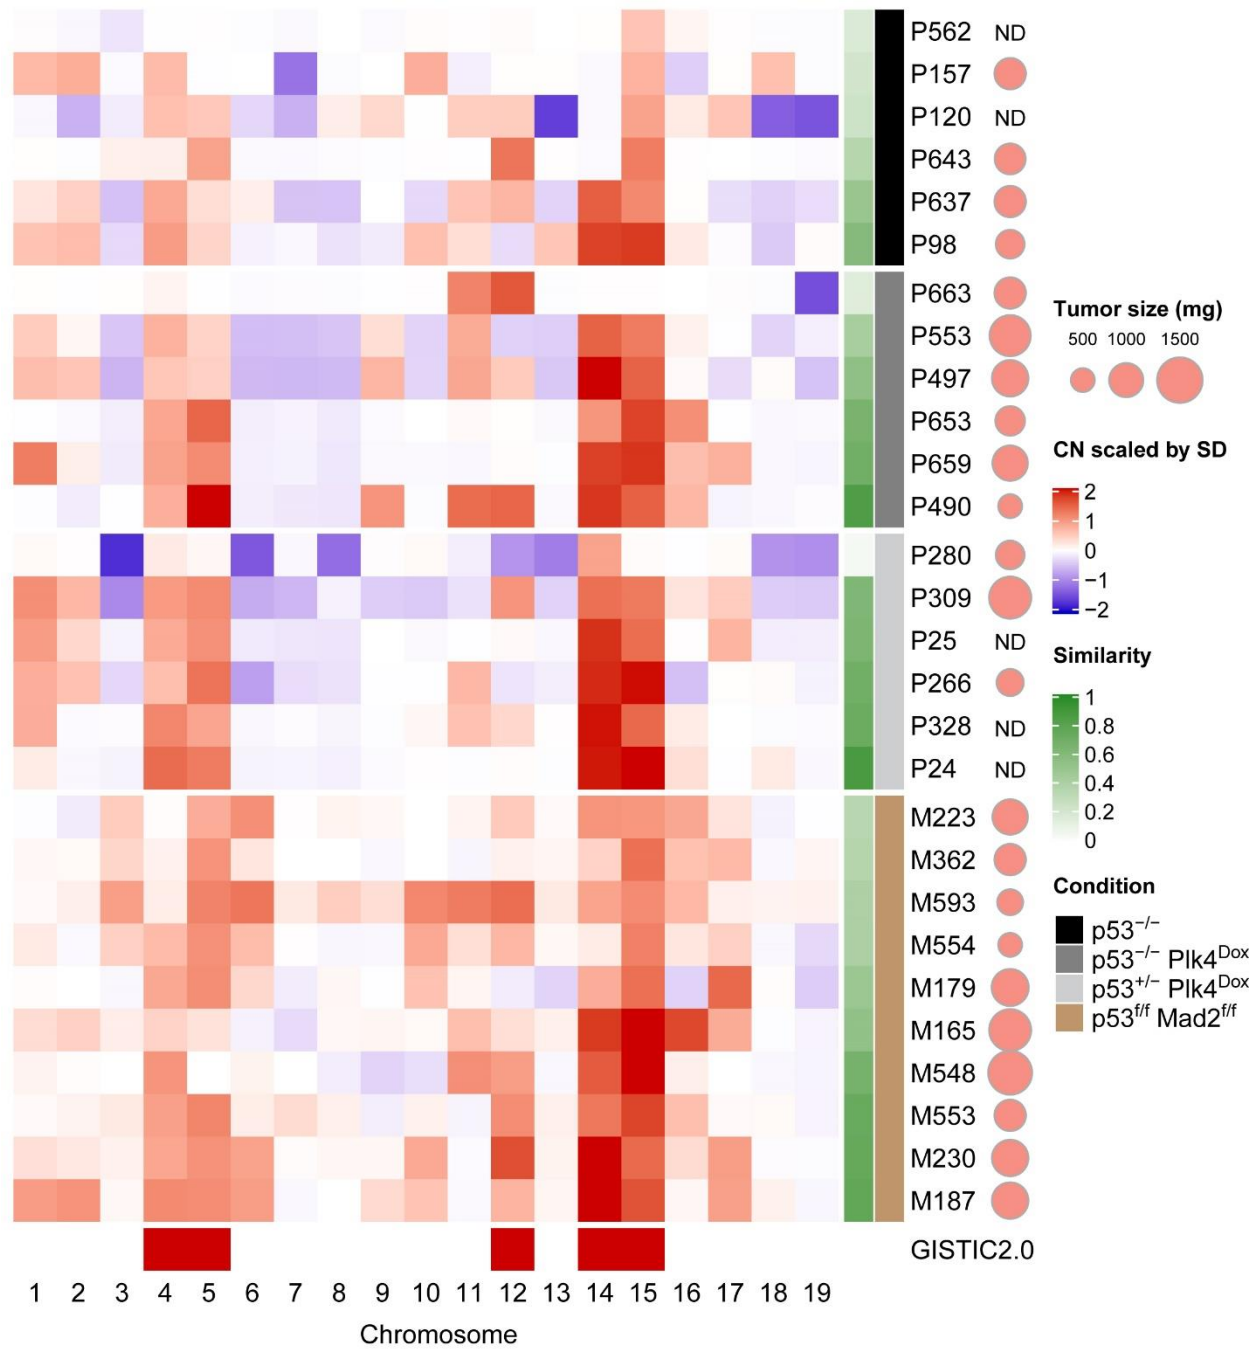

854

855

856 **Figure 4 | CIN accelerates the selection for a specific aneuploidy profile.** Heatmap  
 857 showing averaged chromosome DNA copy number changes in late tumors (>500mg)  
 858 from non-induced p53<sup>-/-</sup> PRG5 mice (black), two-weeks doxycycline treated (at the age  
 859 of 30 days) p53<sup>-/-</sup> PRG5 mice (dark grey) and p53<sup>+/-</sup> PRG5 mice (light grey), and Lck-

860 Cre+; Mad2f/f; p53f/f mice (brown). Copy number changes of PRG5 mice were  
861 determined using whole-genome sequencing. Averaged copy number from single-cell  
862 whole genome sequencing (as shown in Figure 1d) is shown for tumors from Mad2 mice.  
863 Genomic Identification of Significant Targets in Cancer (GISTIC) 2.0 analysis showing  
864 significant aneuploidies across all tumors is shown at the bottom. The similarity of  
865 individual tumors to the GISTIC 2.0 output is presented in the green heatmap (see  
866 Supplementary Table 4 for similarity values). Scaled tumor weights are presented (ND –  
867 not determined).

868

869

870

871

872

873

874

875

876

877

878

879

880

881

882

883

884

Figure 5 | Transient CIN selects for a specific aneuploidy profile early during tumor development

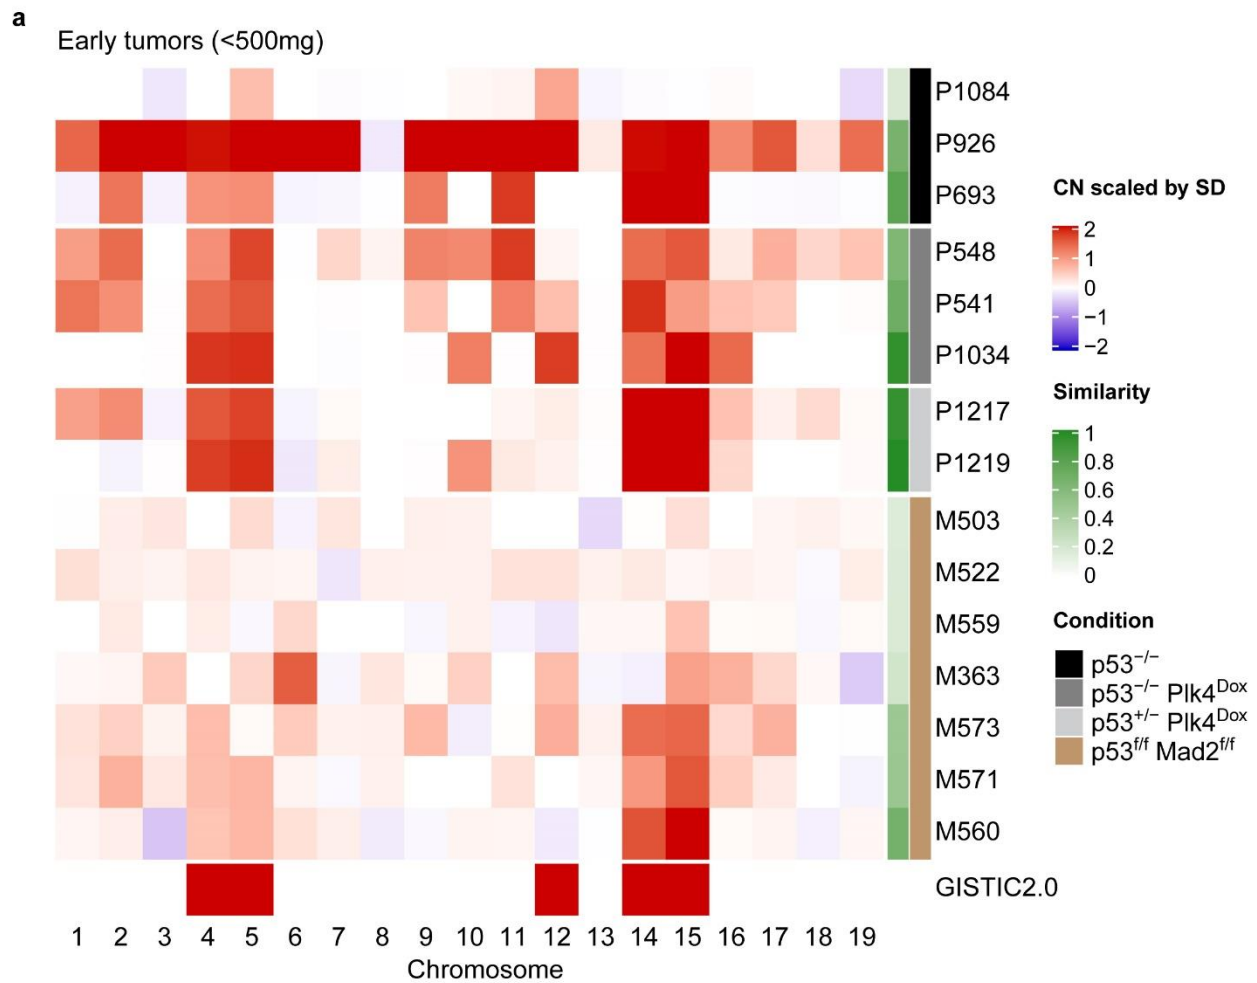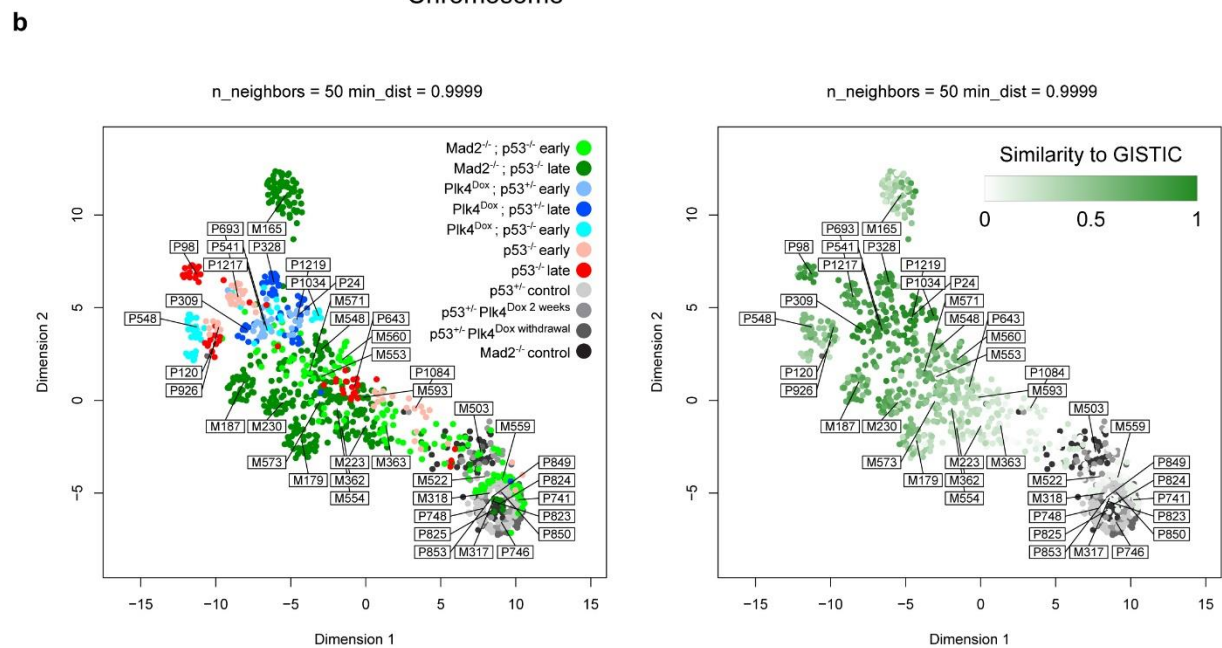

886 **Figure 5 | Transient CIN selects for a specific aneuploidy profile early during tumor**  
887 **development. (a)** Heatmap showing averaged DNA copy number changes in early  
888 tumors (<500mg) from non-induced p53<sup>-/-</sup> PRG5 mice (black), two-weeks doxycycline  
889 treated (at the age of 30 days) p53<sup>-/-</sup> PRG5 mice (dark grey) and p53<sup>+/-</sup> PRG5 mice (light  
890 grey), and Lck-Cre<sup>+</sup>; Mad2<sup>f/f</sup>; p53<sup>f/f</sup> mice (brown) as determined using single-cell whole  
891 genome sequencing. Single cell data of tumors from PRG5 mice is presented in  
892 Supplementary Figure 11, and of Mad2 mice in Figure 1c. Genomic Identification of  
893 Significant Targets in Cancer (GISTIC) 2.0 analysis showing significant aneuploidies  
894 across all tumors is shown at the bottom. The similarity of individual tumors to the GISTIC  
895 2.0 output is presented in the green heatmap. **(b)** left: Uniform Manifold Approximation  
896 and Projection (UMAP) analysis of DNA copy number changes in control (grey shades),  
897 p53<sup>-/-</sup> non induced PRG5 tumors (red shades), doxycycline induced PRG5 tumors (blue  
898 shades), and Mad2 tumors (green shades). Right: Embedding of the GISTIC 2.0 similarity  
899 score for each sample shown in the UMAP plot on the left. Control samples were not used  
900 for the GISTIC 2.0 analysis and appear in grey shades.

901

902

903

904

905

906

907

908

909

910

911

912



Supplementary Figure 1 | Mad2-deficient thymic lymphomas lack a functional SAC and display ongoing CIN

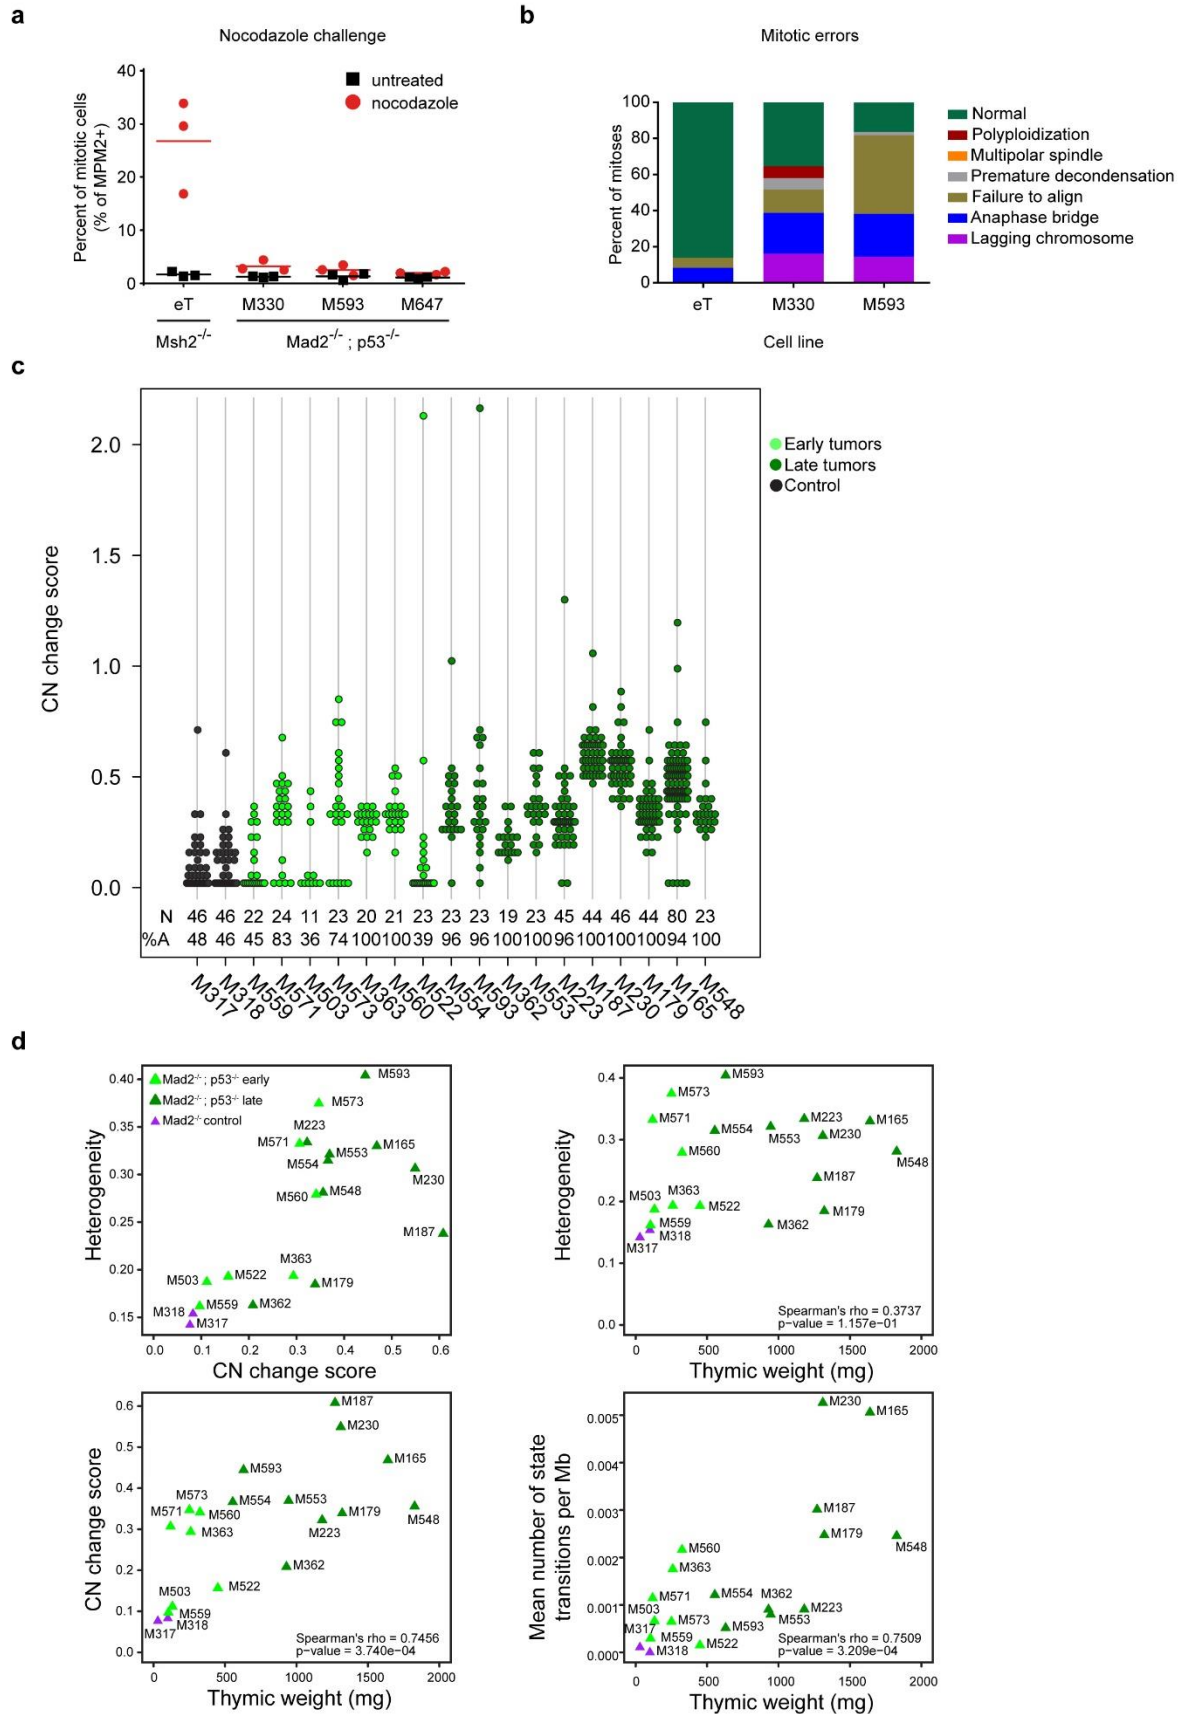

914 **Supplementary Figure 1 | Mad2-deficient thymic lymphomas lack a functional SAC**  
915 **and display ongoing CIN.** (a) Percentage of mitotic (MPM2+) cells in primary Mad2<sup>-/-</sup>;  
916 p53<sup>-/-</sup> or Msh2<sup>-/-</sup> T-ALL cultures with or without a nocodazole challenge for six hours. (b)  
917 Frequency of abnormal mitoses observed in Mad2<sup>f/f</sup>; p53<sup>f/f</sup>; Lcke primary T-ALL cultures  
918 as determined using live-cell time-lapse imaging after transduction with H2B-mCherry. (c)  
919 Analysis of copy number changes of the samples pf Figure 1b-d. The numbers below the  
920 dot plots indicate the total number of cells and the percentage of cells that has at least  
921 one whole chromosome gain or loss. (d) Genome-wide karyotype measures  
922 (heterogeneity score and CN [copy number] change score) for all samples shown in  
923 Figure 1b-d. Structural aberration scores (Mean number of state transitions per Mb) were  
924 defined by the number of copy number state transitions per Mb plotted against the weight  
925 of the thymus at time of harvest. Correlations were determined using Spearman's rank-  
926 order test. See methods for details about the karyotype measures displayed.

927

928

929

930

931

932

933

934

935

936

937

938

939

Supplementary Figure 2 | Effect of PLK4 overexpression in vitro and in vivo

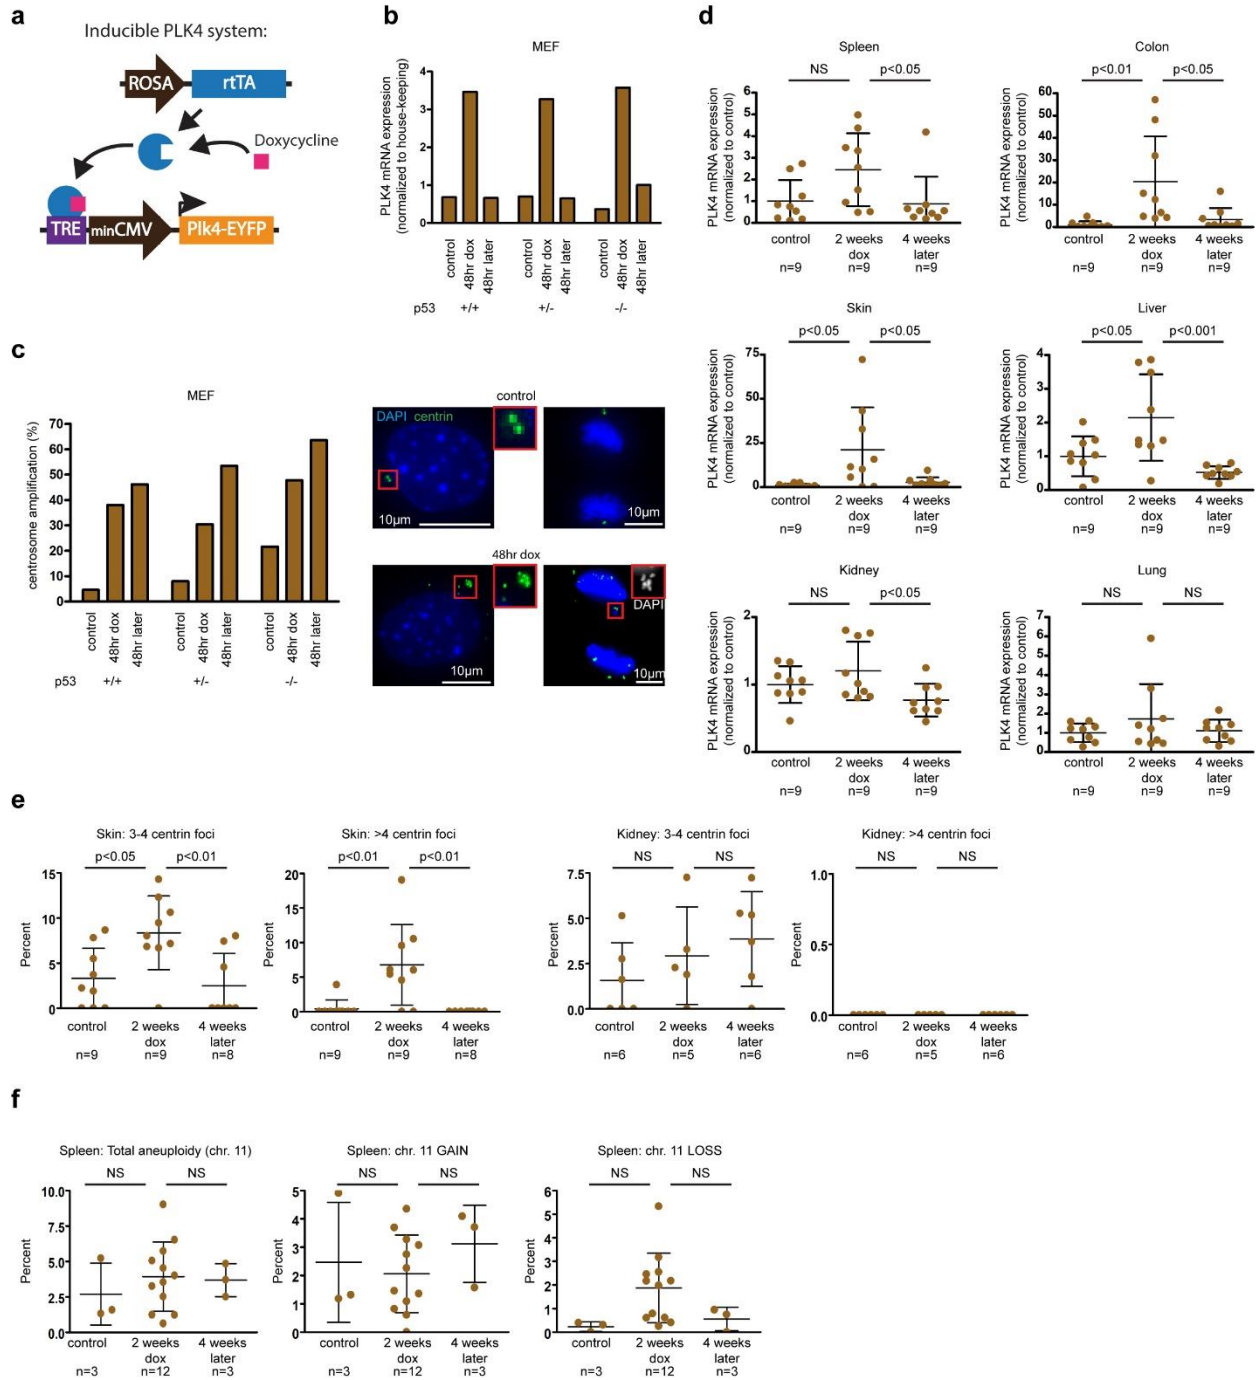

940

941

942

943

944

945 **Supplementary Figure 2 | Effect of PLK4 overexpression in vitro and in vivo. (a)**  
946 Inducible Plk4 expression using the tetracycline-on system. Doxycycline provided in  
947 mouse chow binds the reverse tetracycline-controlled trans-activator (rtTA, inserted in the  
948 Rosa locus) that together bind a Tet Response Element (TRE) upstream of Plk4 (inserted  
949 into the Col1A locus). **(b)** Plk4 mRNA levels in mouse embryonic fibroblasts derived from  
950 p53+/, p53+/-, and p53-/- PRG5 mice, before (control) immediately after (48hr dox) and  
951 48 hours after (48hr later) doxycycline administration. **(c)** Frequency of centrosome  
952 amplification as determined using centring-GFP in mouse embryonic fibroblasts derived  
953 from p53+/, p53+/-, and p53-/- PRG5 mice, before (control) immediately after (48hr dox)  
954 and 48 hours after (48hr later) doxycycline administration. **(d-f)** Plk4 mRNA levels **(d)**,  
955 measurement of centrin-GFP foci **(e)**, and percent aneuploidy for chromosome 11 (using  
956 interphase DNA-FISH, **f**) in indicted tissues from PRG5 mice before (control) immediately  
957 after (2 weeks dox) and one month after (4 weeks later) doxycycline administration. Mean  
958  $\pm$  SD of indicated mice per group are presented. \*p-values determined using one-way  
959 ANOVA with Tukey's Multiple Comparison Test.

960

961

962

963

964

965

966

967

968

969

970

971

Supplementary Figure 3 | Effects of timing and duration of chromosome instability on tumor formation

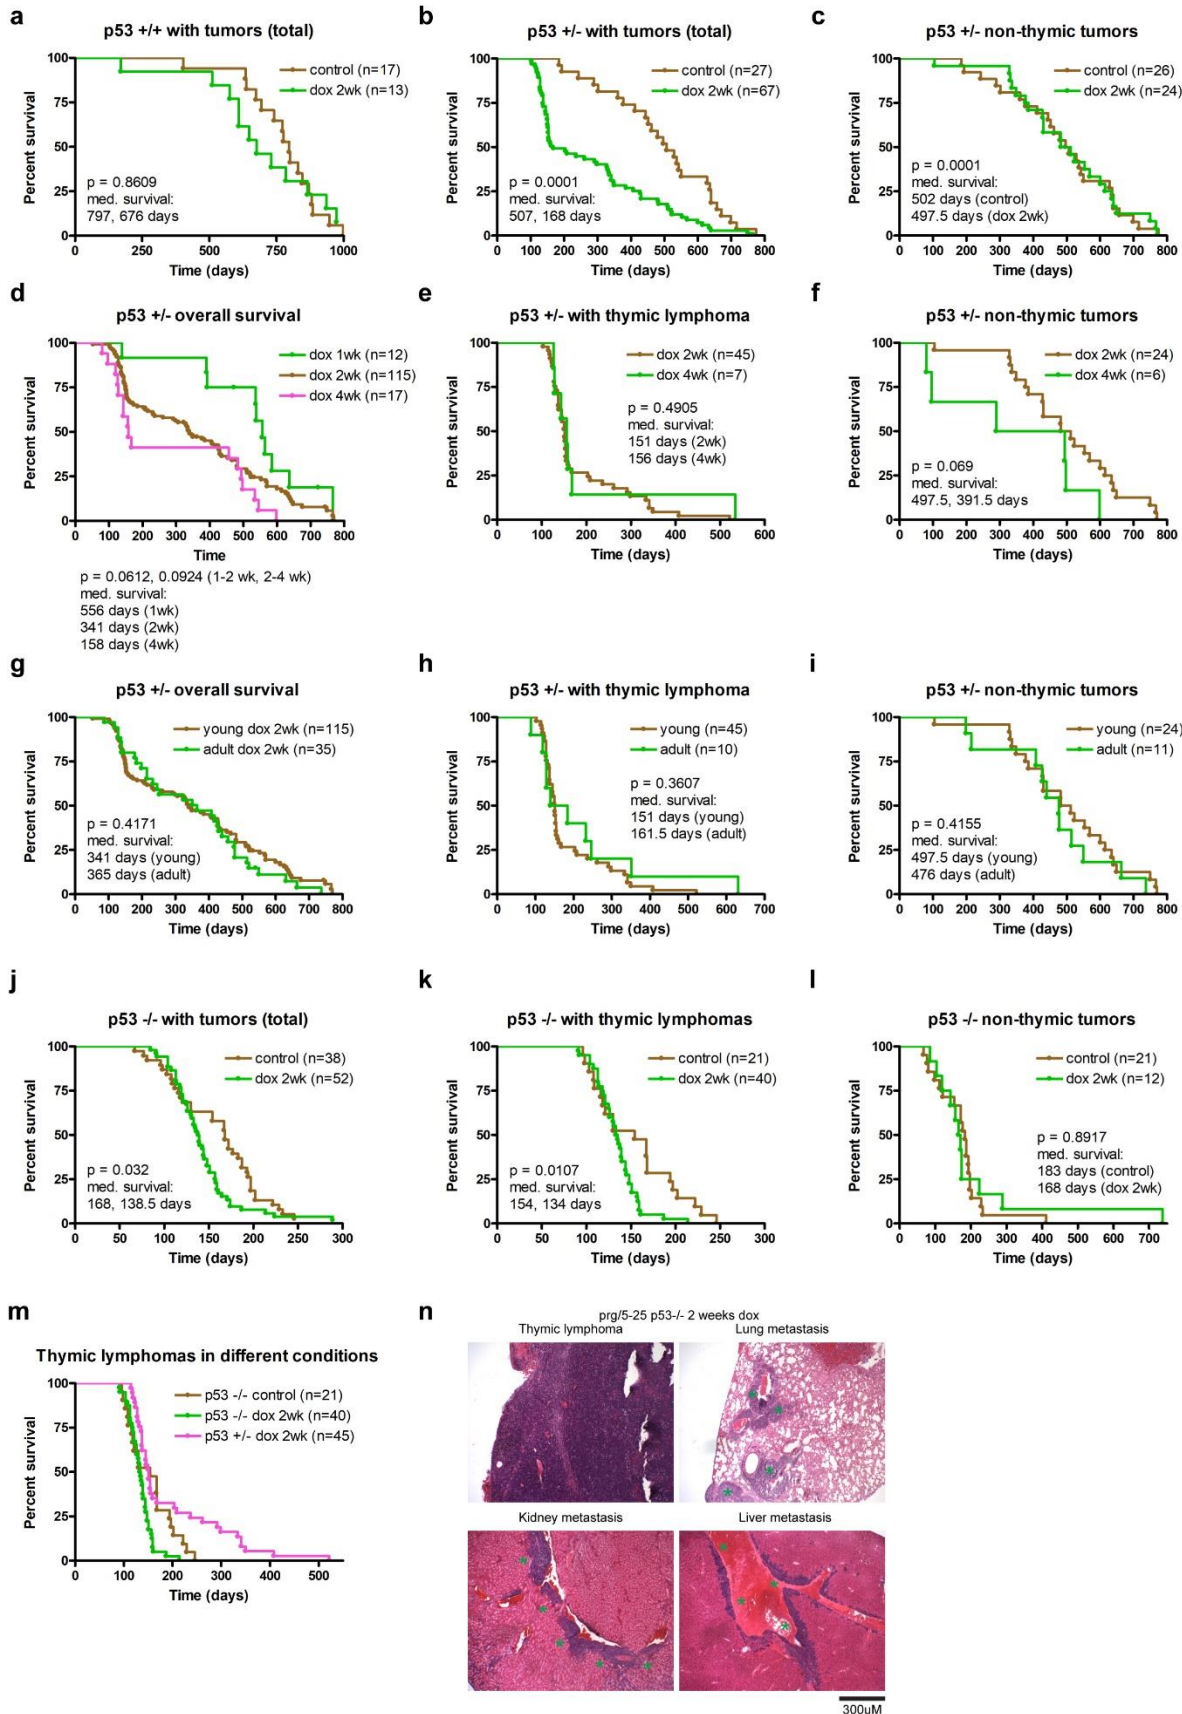

973 **Supplementary Figure 3 | Effects of timing and duration of chromosome instability**  
974 **on tumor formation. (a-m)** Survival (Kaplan-Meier) plots of PRG5 mice treated with the  
975 indicated doxycycline regimens (dox 1wk/2wk/4wk – treated with doxycycline for 1/2/4  
976 weeks at the age of 30 days; young/adult dox 2wk – 2 weeks treatment of doxycycline  
977 starting at 30/100 days of age) and with the indicated p53 backgrounds (p53+/+, p53+/-,  
978 p53-/-). Overall survival and survival of mice bearing either thymic or non-thymic tumors  
979 are presented. Comparison of indicated number of mice done using log rank test. **(n)**  
980 Representative images of thymic lymphoma metastases from a 2-weeks Plk4 induced  
981 p53-/- PRG5 mouse. See Supplementary Table 1 for a histology analysis of tissues from  
982 a total of 104 mice.

983

984

985

986

987

988

989

990

991

992

993

994

995

996

997

998



Supplementary Figure 4 | Differential gene expression analysis comparing thymic lymphomas and normal thymus

a

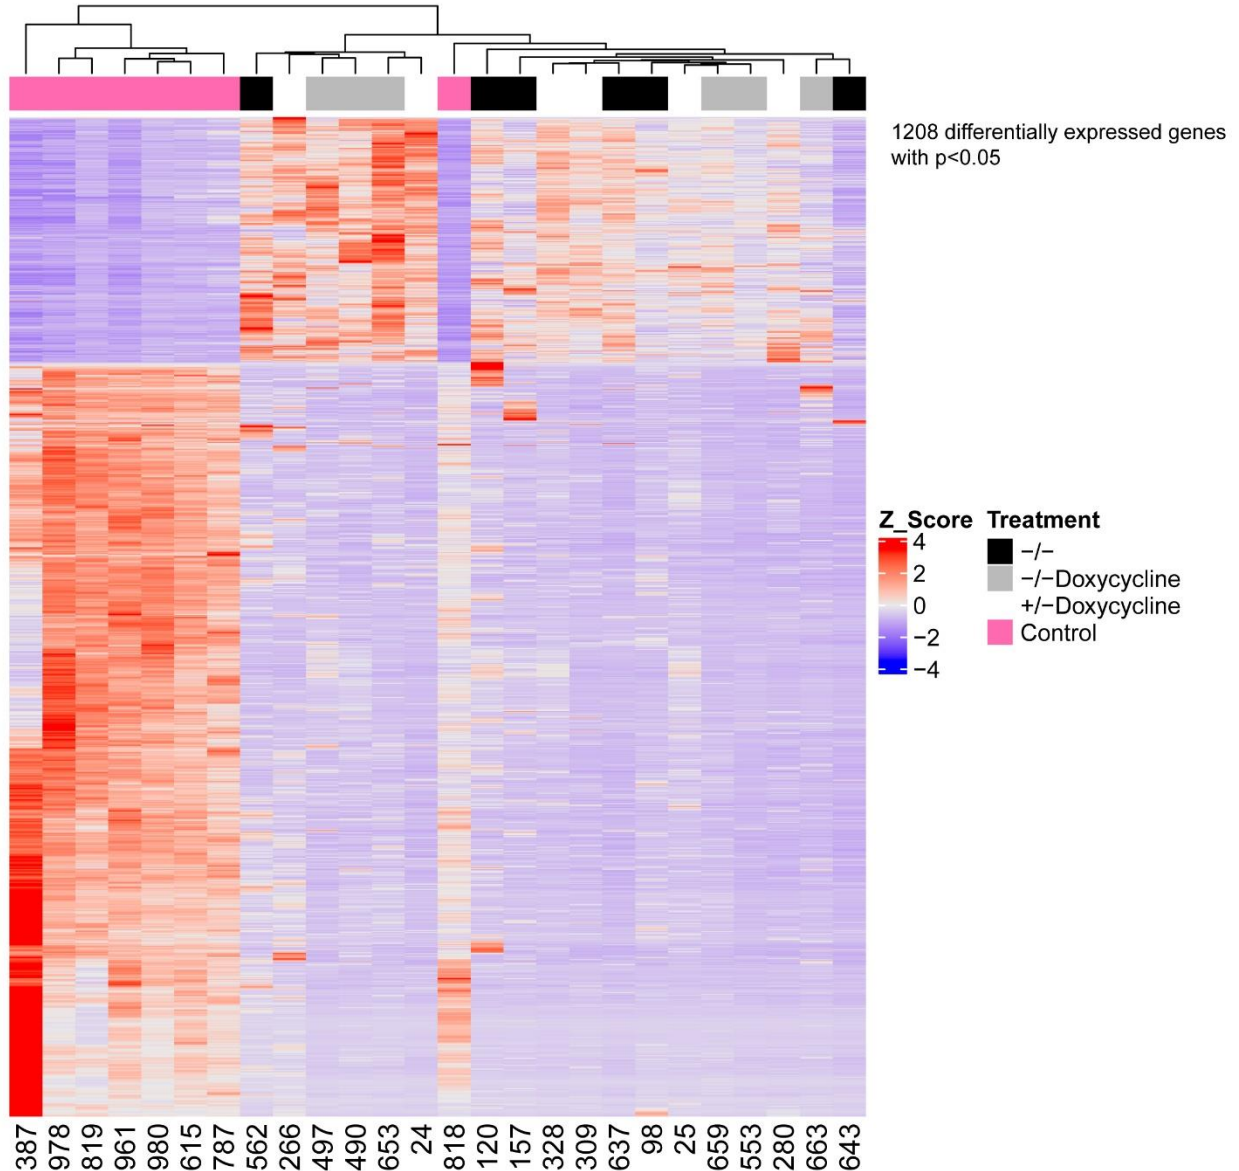

b

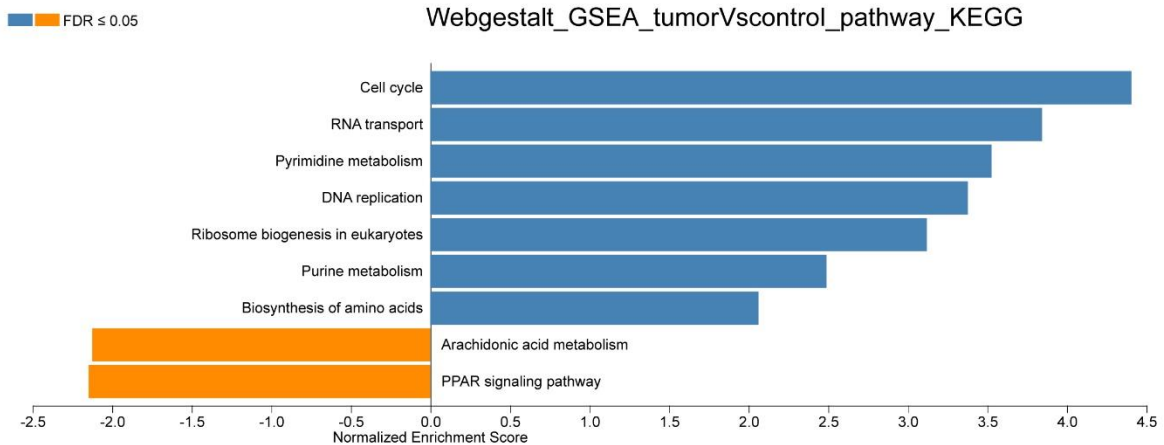

1000 **Supplementary Figure 4 | Differential gene expression analysis comparing thymic**  
1001 **lymphomas and normal thymus. (a)** Differentially expressed genes as determined  
1002 using RNA sequencing between control normal thymuses and PRG5 derived thymic  
1003 lymphomas. See Supplementary Table 2 for a complete list of the differentially expressed  
1004 genes **(b)** Significantly enriched KEGG pathways in control thymuses and in PRG5  
1005 derived thymic lymphomas determined using Webgestalt GSEA analysis.

1006

1007

1008

1009

1010

1011

1012

1013

1014

1015

1016

1017

1018

1019

1020

1021

1022

1023

Supplementary Figure 5 | Pathway analysis reveals differences between thymic lymphomas and normal thymus

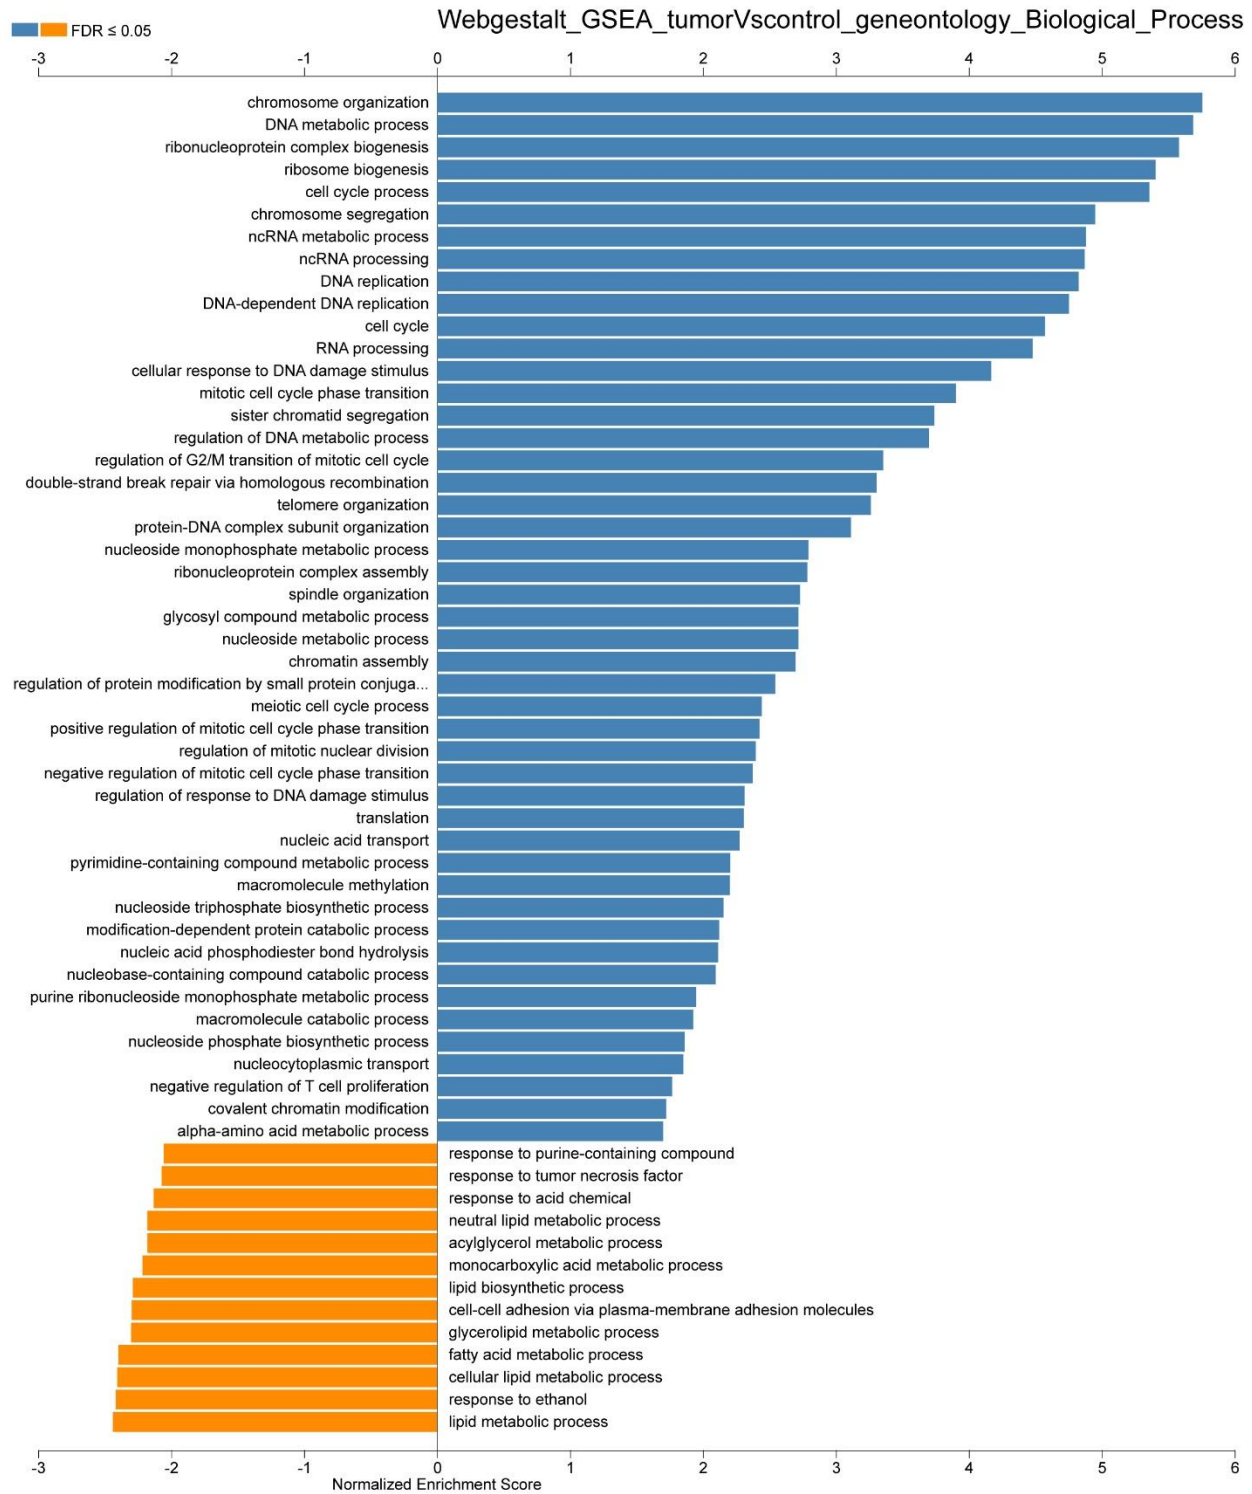

1024

1025

1026 **Supplementary Figure 5 | Pathway analysis reveals differences between thymic**  
1027 **lymphomas and normal thymus.** Significantly enriched Gene Ontology (Biological  
1028 Processes) pathways in control thymuses and in PRG5 derived thymic lymphomas  
1029 determined using Webgestalt GSEA analysis.

1030

1031

1032

1033

1034

1035

1036

1037

1038

1039

1040

1041

1042

1043

1044

1045

1046

1047

1048

1049

Supplementary Figure 6 | p53 LOH occurs through whole-chromosome mis-segregation without structural changes

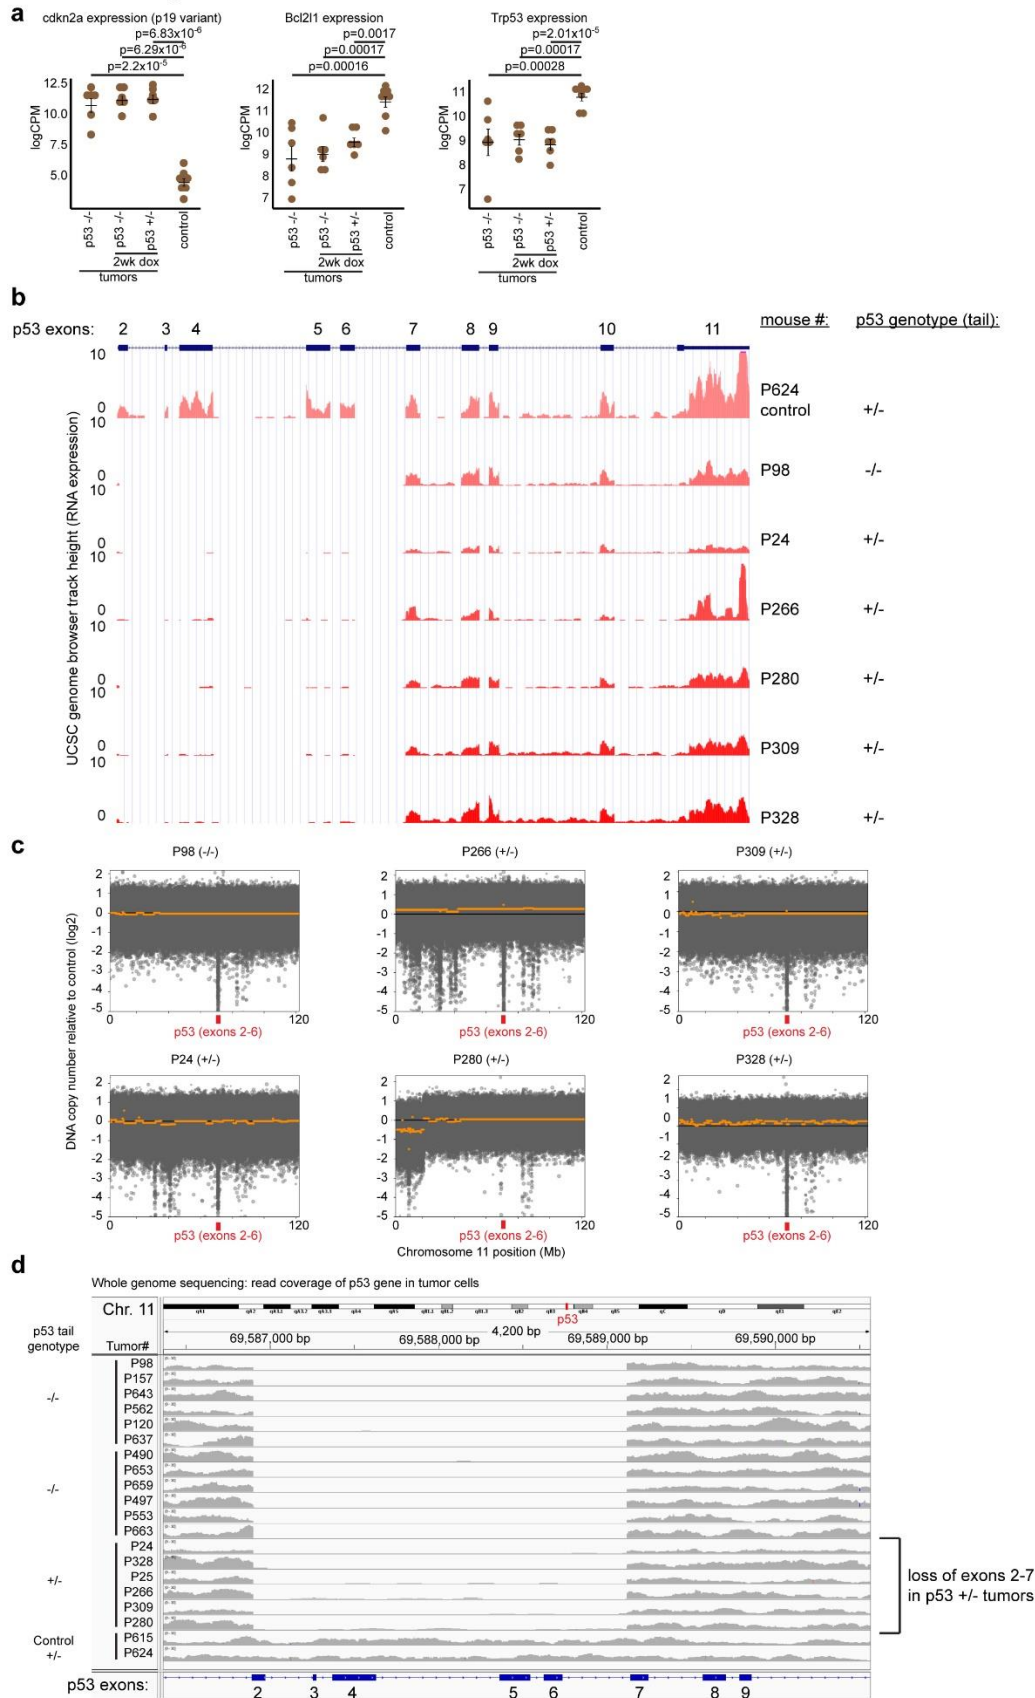

1051 **Supplementary Figure 6 | p53 LOH occurs through whole-chromosome mis-**  
1052 **segregation without structural changes. (a)** Comparison of mRNA expression levels  
1053 (log[counts per million]) of indicated PRG5 tumors (n=6 tumors from each group) and  
1054 control thymuses (n=8). Mean  $\pm$  SD, and p-values calculated using one-way ANOVA are  
1055 presented. **(b)** UCSC genome browser tracks showing RNA expression of exons 2-11 of  
1056 p53 in indicated mice. **(c)** CNVkit derived DNA copy number plots of chromosome 11 in  
1057 tumors from the indicated PRG5 mice. Black line represents the diploid control and the  
1058 orange line represents the mean copy number of the indicated sample. The location of  
1059 the *p53* gene is indicated in red. **(d)** Zoom on exons 2-6 of the p53 gene using Integrated  
1060 Genome Viewer (IGV 2.3.97) showing number of reads in the indicated samples.

1061

1062

1063

1064

1065

1066

1067

1068

1069

1070

1071

1072

1073

1074

1075

1076



Supplementary Figure 7 | Common molecular events in spontaneous and induced lymphomas

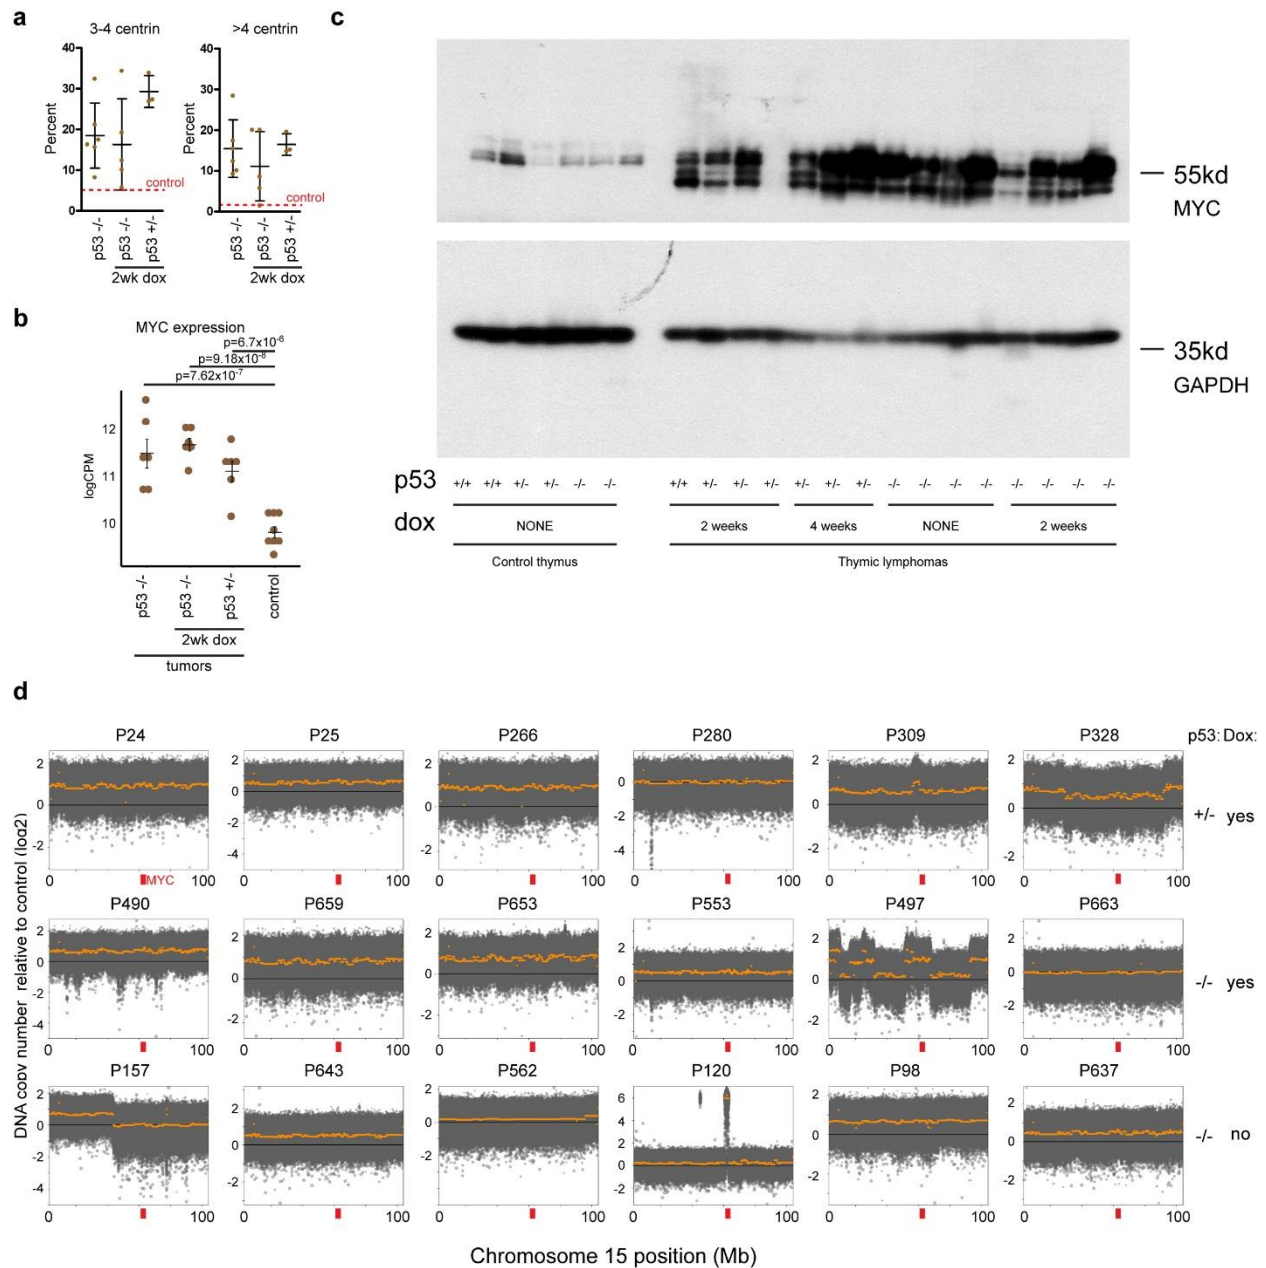

1077

1078 **Supplementary Figure 7 | Common molecular events in spontaneous and induced**  
 1079 **lymphomas.** (a) Measurement of centrin-GFP foci in thymic lymphomas from indicated  
 1080 PRG5 mice. Mean  $\pm$  SD of n=6 (p53<sup>-/-</sup>), n=5 (p53<sup>-/-</sup> 2wk dox), and n=3 (p53<sup>+/-</sup> 2wk dox)  
 1081 are presented. Dashed red line represents the control shown in Figure 2f. (b) Comparison  
 1082 of mRNA expression levels (log[counts per million]) of indicated PRG5 tumors (n=6  
 1083 tumors from each group) and control thymuses (n=8). Mean  $\pm$  SD, and p-values  
 1084 calculated using one-way ANOVA are presented. (c) Myc protein levels as seen using

1085 SDS gel electrophoresis immunoblotting in the indicated control or tumor samples.  
1086 GAPDH is shown as a loading control. **(d)** CNVkit derived DNA copy number plots of  
1087 chromosome 15 in tumors from the indicated PRG5 mice. Black line represents the diploid  
1088 control and the orange line represents the mean copy number of the indicated sample.  
1089 The location of the MYC gene is indicated in red.

1090

1091

1092

1093

1094

1095

1096

1097

1098

1099

1100

1101

1102

1103

1104

1105

1106

1107

1108

Supplementary Figure 8 | Tumor clonality derived from RNA sequencing data

**a**

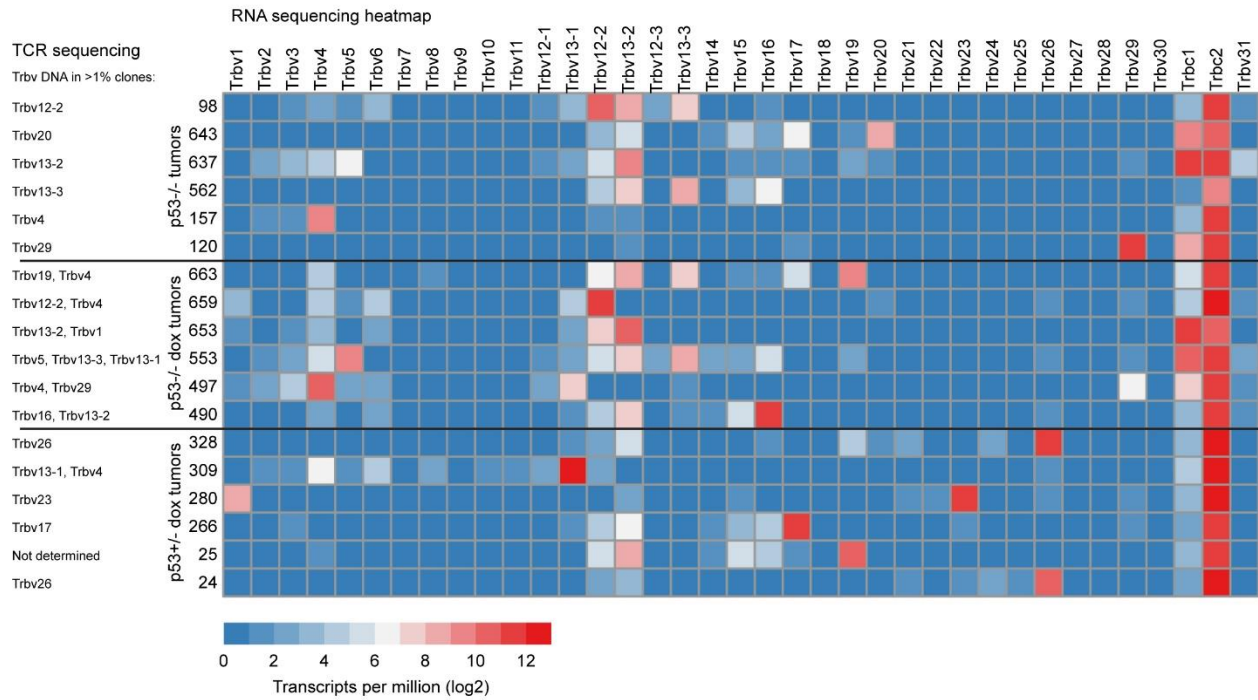

**b**

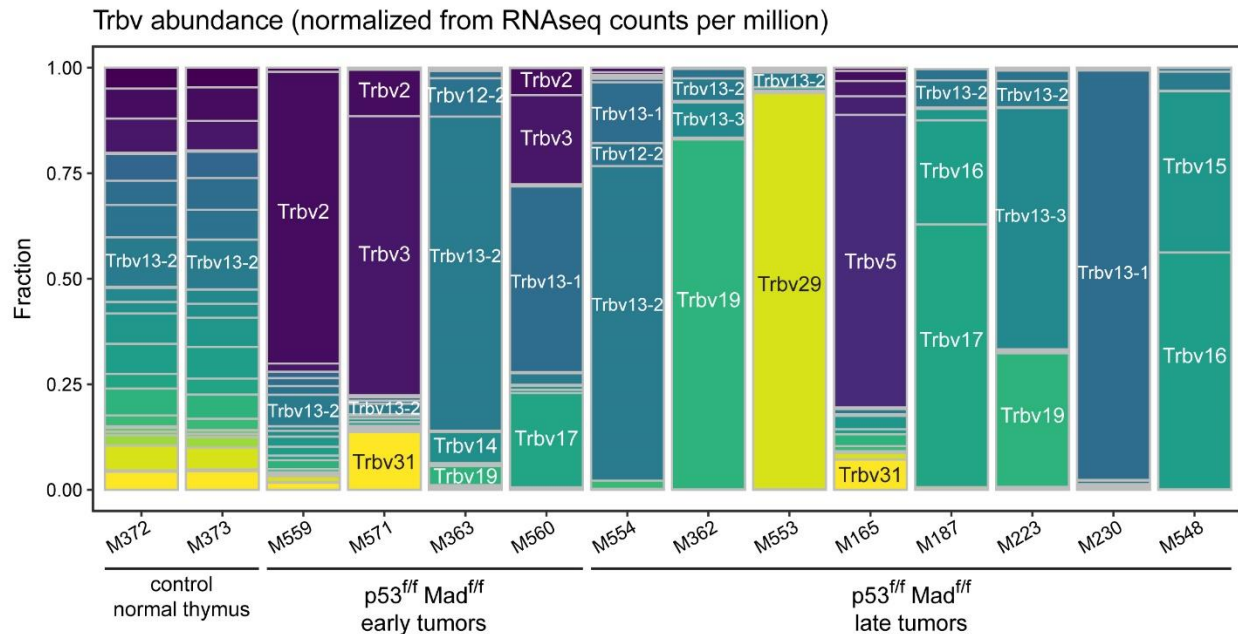

1109

1110 **Supplementary Figure 8 | Tumor clonality derived from RNA sequencing data. (a-b)**

1111 Expression of T cell receptor variable region genes (Trbv genes) as determined using

1112 RNA sequencing in tumors from (a) PRG5 mice and (b) Mad2 mice. Trbv genes with

1113 frequency > 1% in PRG5 tumors as detected using T cell receptor DNA sequencing (as  
1114 shown in Figure 3j-k) is presented in **a**.

1115

1116

1117

1118

1119

1120

1121

1122

1123

1124

1125

1126

1127

1128

1129

1130

1131

1132

1133

1134

1135

Supplementary Figure 9 | DNA and RNA levels in single biopsies of thymic lymphomas

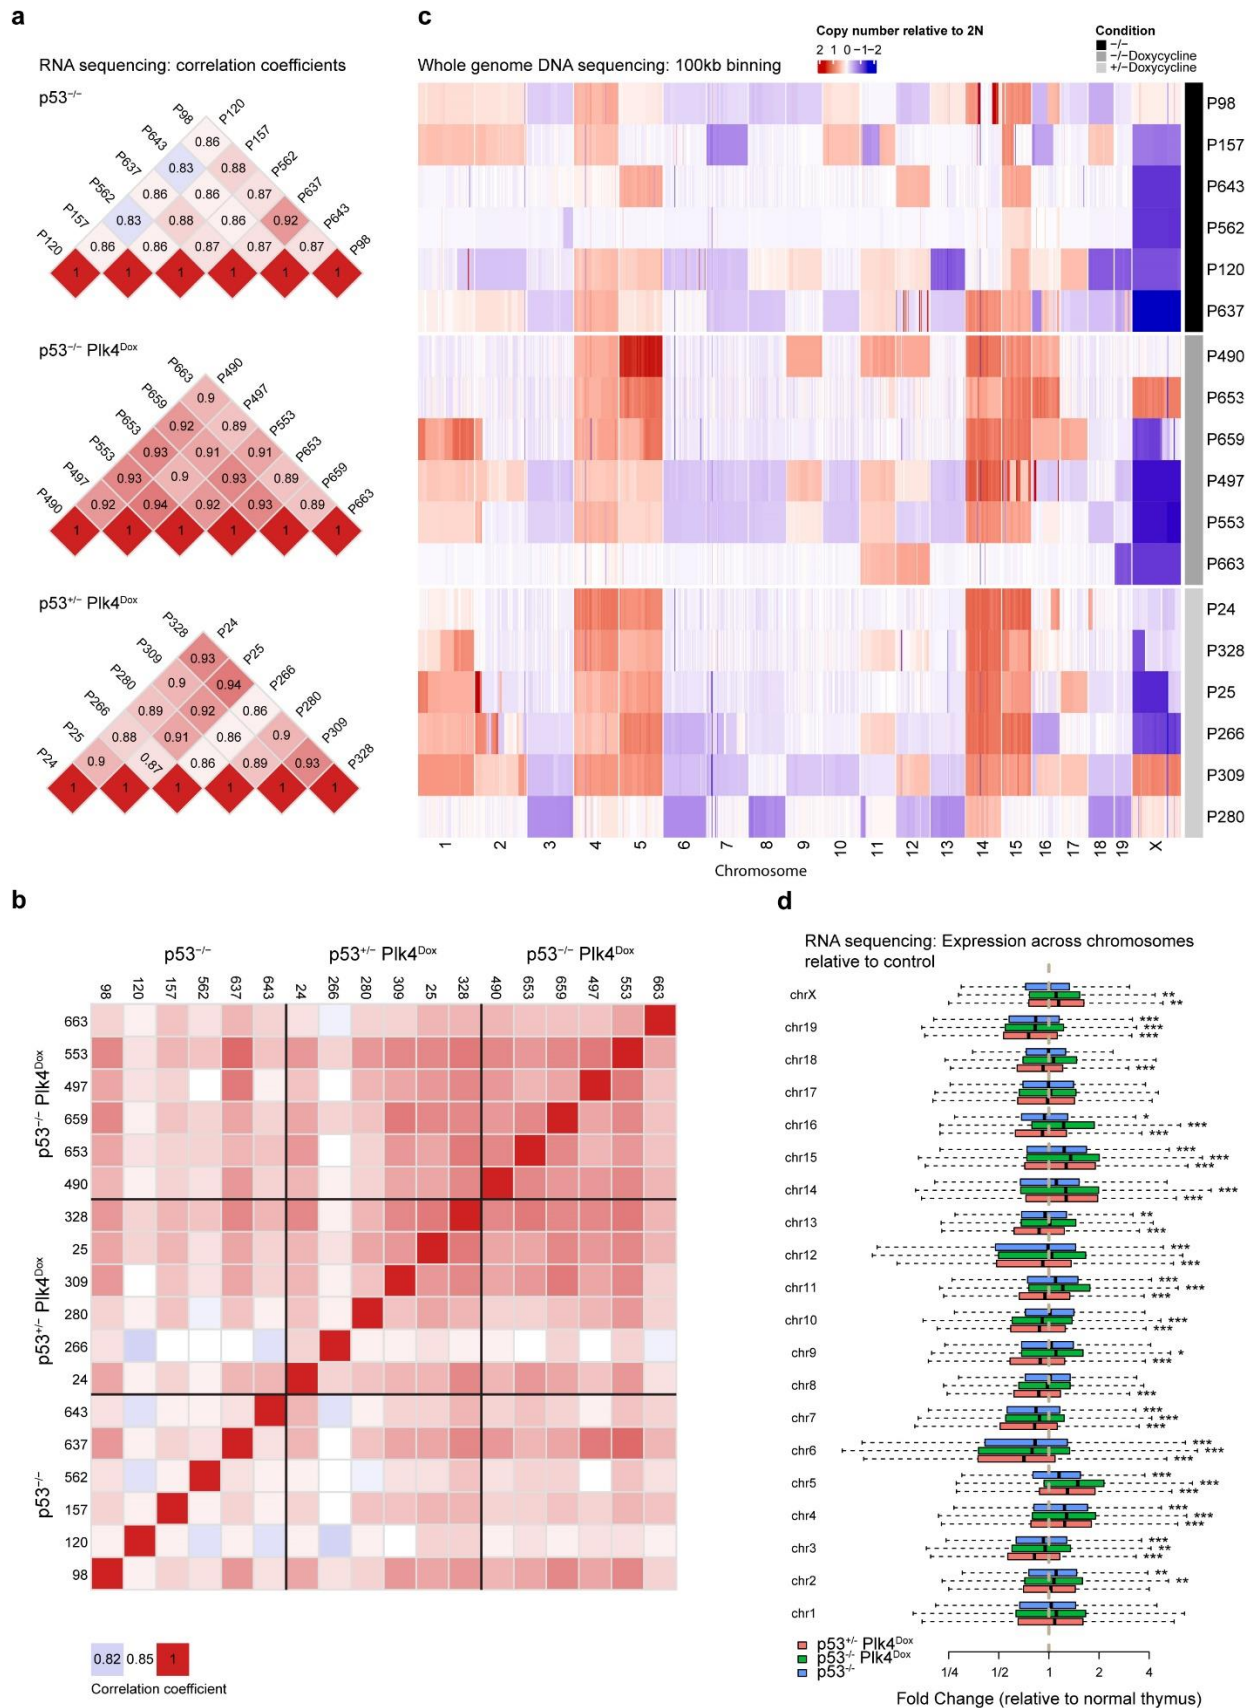

1137 **Supplementary Figure 9 | DNA and RNA levels in single biopsies of thymic**  
1138 **lymphomas. (a-b)** Heatmaps showing pair-wised Pearson correlation coefficients among  
1139 samples on TPM values as determined using RNA sequencing of the indicated PRG5  
1140 tumor in **(a)** single biopsies or **(b)** multiregional biopsies. **(c)** Heatmap showing 100-kb  
1141 DNA copy number changes in late tumors (>500mg) from non-induced p53<sup>-/-</sup> PRG5 mice  
1142 (black), two-weeks doxycycline treated (at the age of 30 days) p53<sup>-/-</sup> PRG5 mice (dark  
1143 grey) and p53<sup>+/-</sup> PRG5 mice (light grey) as determined using whole-genome sequencing.  
1144 **(d)** The fold change of each gene between each tumor group and the control (n=6 for  
1145 each group) was calculated, and boxplots of grouping all genes by chromosome for each  
1146 comparison are presented. p-values (comparing expression levels from individual  
1147 chromosomes between of each tumor group and the control) were determined using  
1148 wilcoxon rank sum test, \*: p<0.05; \*\*:p<0.01 and \*\*\*:p<0.001.

1149

1150

1151

1152

1153

1154

1155

1156

1157

1158

1159

1160

1161

1162



Supplementary Figure 10 | DNA and RNA levels in multifocal biopsies of thymic lymphomas

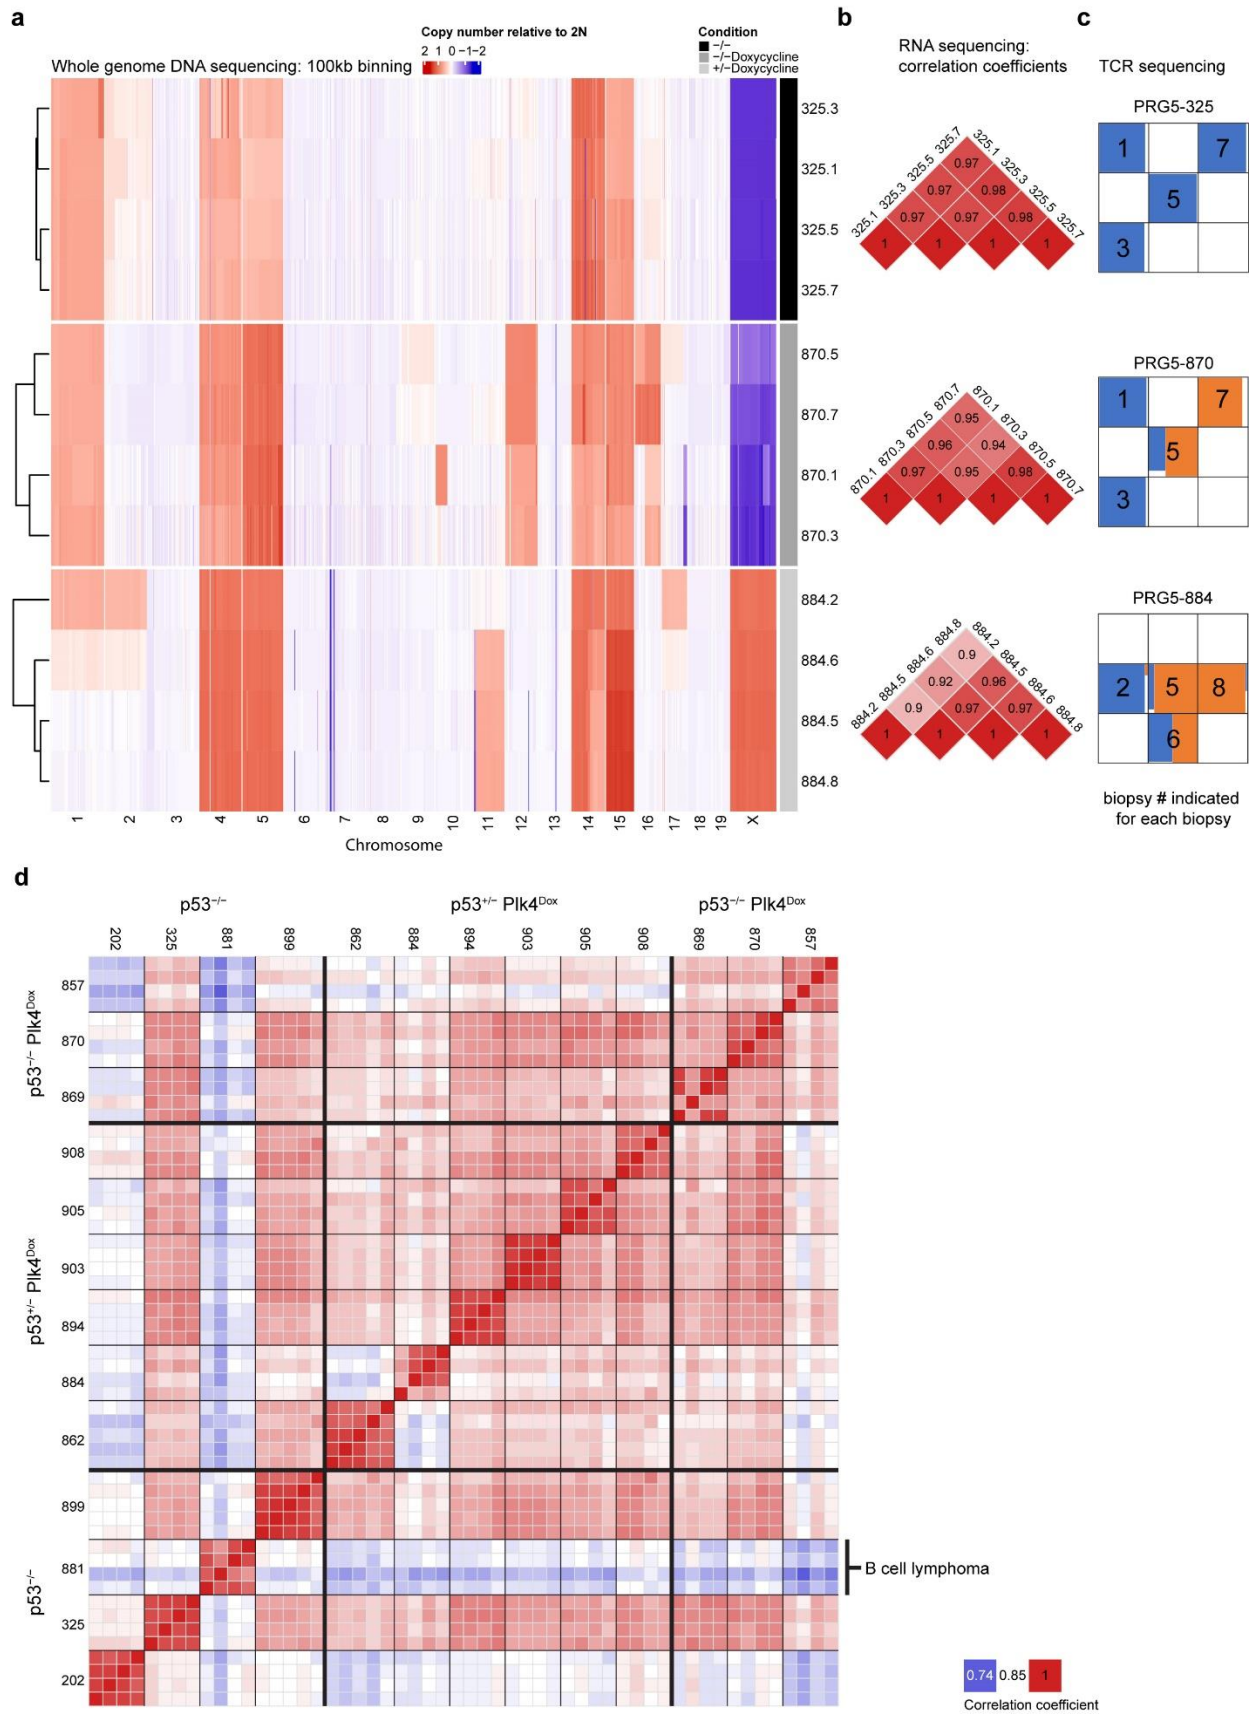

1164 **Supplementary Figure 10 | DNA and RNA levels in multifocal biopsies of thymic**  
1165 **lymphomas. (a)** Heatmap showing 100-kb DNA copy number changes in multiple  
1166 regions taken from late tumors (>500mg) from non-induced p53<sup>-/-</sup> PRG5 mice (black),  
1167 two-weeks doxycycline treated (at the age of 30 days) p53<sup>-/-</sup> PRG5 mice (dark grey) and  
1168 p53<sup>+/-</sup> PRG5 mice (light grey) as determined using whole-genome sequencing. **(b, d)**  
1169 Heatmaps showing pair-wised Pearson correlation coefficients among samples on TPM  
1170 values as determined using RNA sequencing of the indicated PRG5 tumor biopsies. **(c)**  
1171 Top ten T cell receptor frequencies (indicative of T cell clones) in thymic T cell lymphomas  
1172 from PRG5 mice in multi-regional biopsies as determined using T cell receptor  
1173 sequencing (these samples are also shown in Figure 3k and presented here for  
1174 convenience).

1175

1176

1177

1178

1179

1180

1181

1182

1183

1184

1185

1186

1187

1188

1189

Supplementary Figure 11 | Single cell DNA sequencing of early and late PRG5 tumors

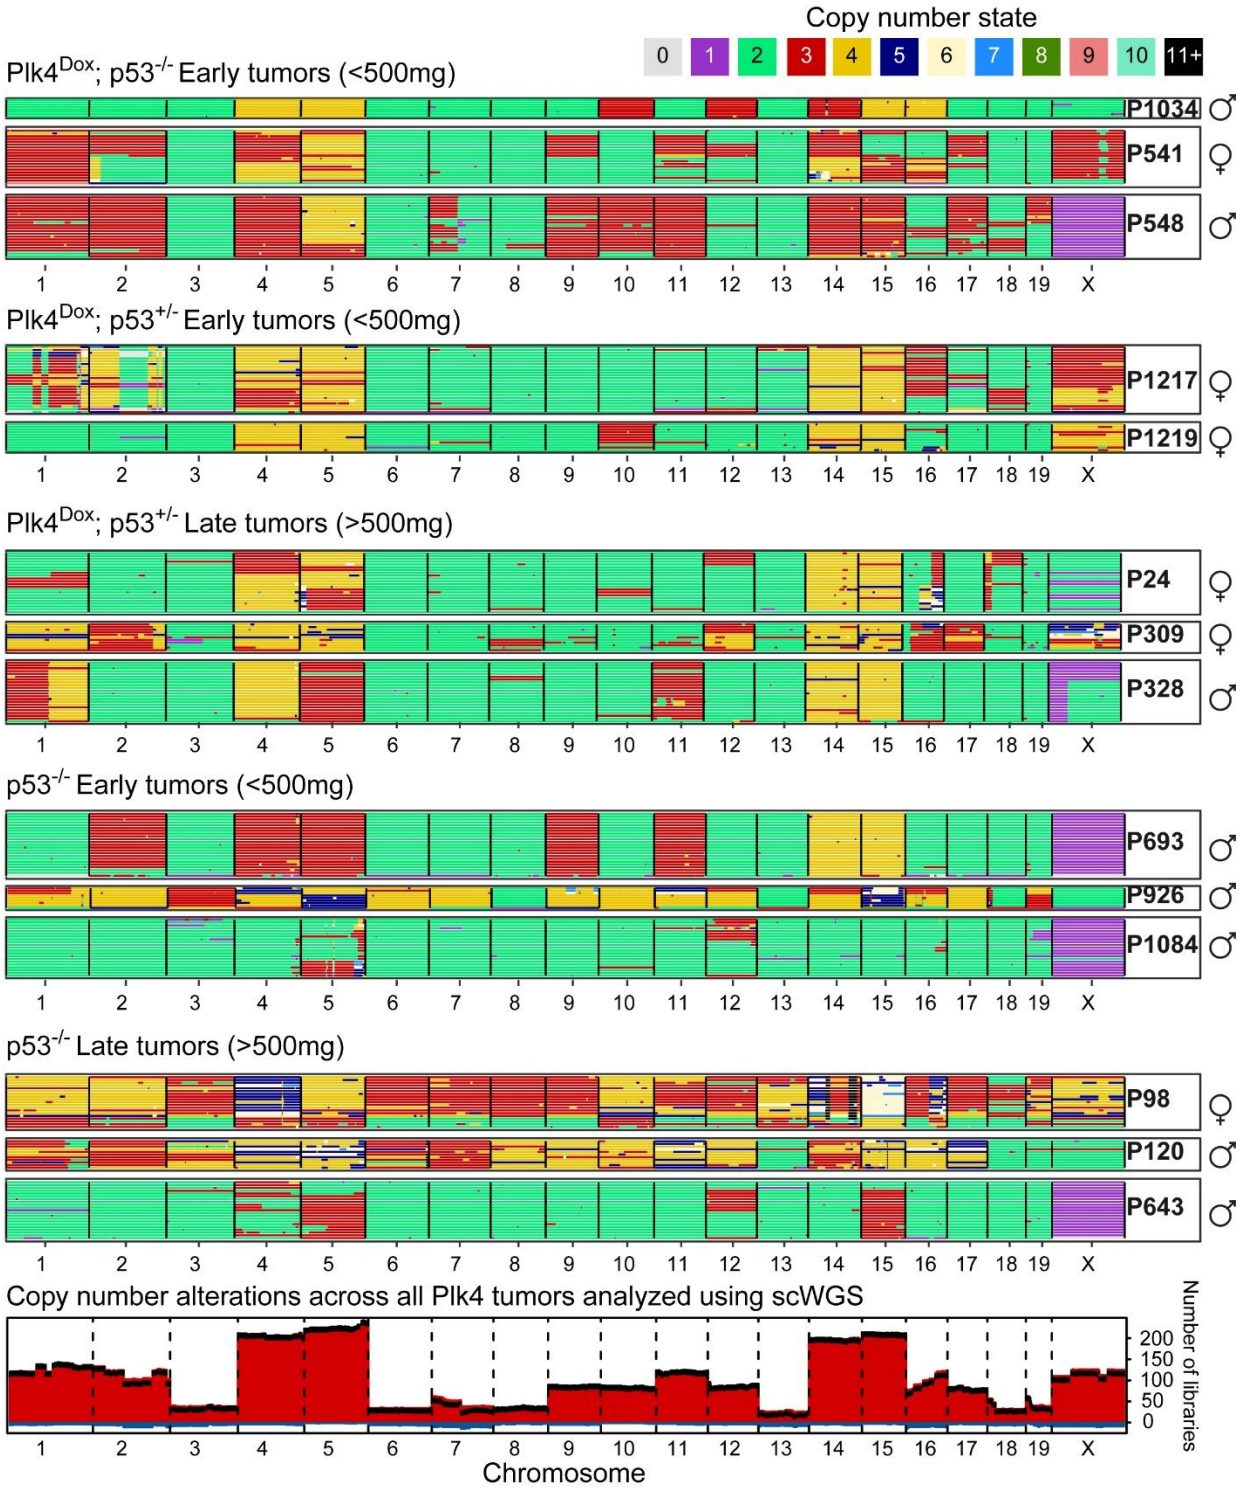

1190

1191

1192 **Supplementary Figure 11 | Single cell DNA sequencing of early and late PRG5**  
1193 **tumors. (a)** Heatmaps showing DNA copy number using single cell whole-genome  
1194 sequencing of Plk4 induced or control early and late PRG5 tumors with the indicated p53  
1195 backgrounds. Genomic position in order from chromosome 1 to X are in the x-axis and  
1196 individual cells are in the y-axis. Colors indicate the copy number state as determined by  
1197 AneuFinder. **(b)** Genome-wide overview of cumulative copy number (1 Mb bins) gains  
1198 (red) and losses (blue) across all thymic lymphomas presented in panel **a**. Black line  
1199 presents the net change; difference between number of libraries with a copy number gain  
1200 and the number of libraries with a copy number loss.

1201

1202

1203

1204

1205

1206

1207

1208

1209

1210

1211

1212

1213

1214

1215

1216

Supplementary Figure 12 | Differences between chronic and transient CIN in driving thymic lymphomas

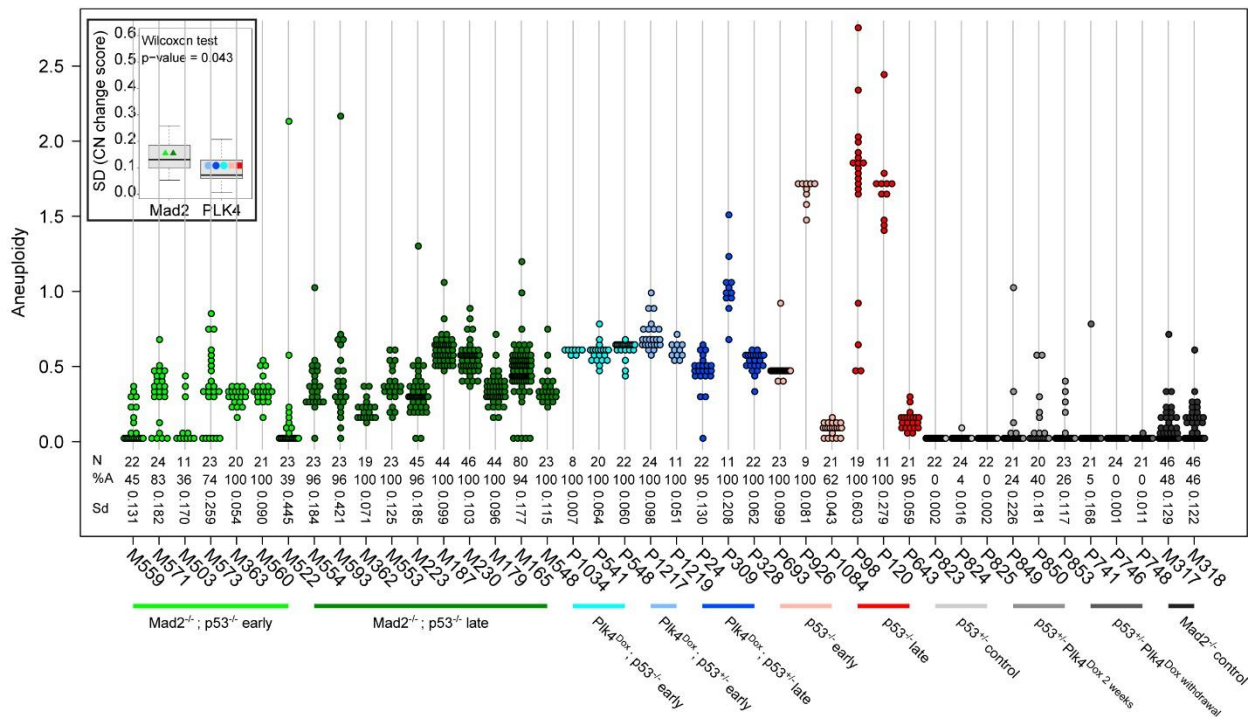

1217

1218 **Supplementary Figure 12 | Differences between chronic and transient CIN in driving**  
 1219 **thymic lymphomas.** Analysis of copy number changes of the entire Mad2 and PRG5  
 1220 cohorts. The numbers below the dot plots indicate the total number of cells (N), the  
 1221 percentage of cells that has at least one whole chromosome gain or loss (%A) and the  
 1222 standard deviation of the copy number change scores of each sample (Sd). The insert  
 1223 boxplot shows the distribution of standard deviation values of the Mad2 and PLK4  
 1224 samples. A Wilcoxon rank-sum test was used to determine if there is a significant  
 1225 difference between the SD values of the Mad2 and PLK4 early samples.

1226

1227

1228

1229

1230

1231



Supplementary Figure 13 | Acquisition of an aneuploidy specific profile reshapes expression of genes in cell cycle, replication, and stress networks  
a

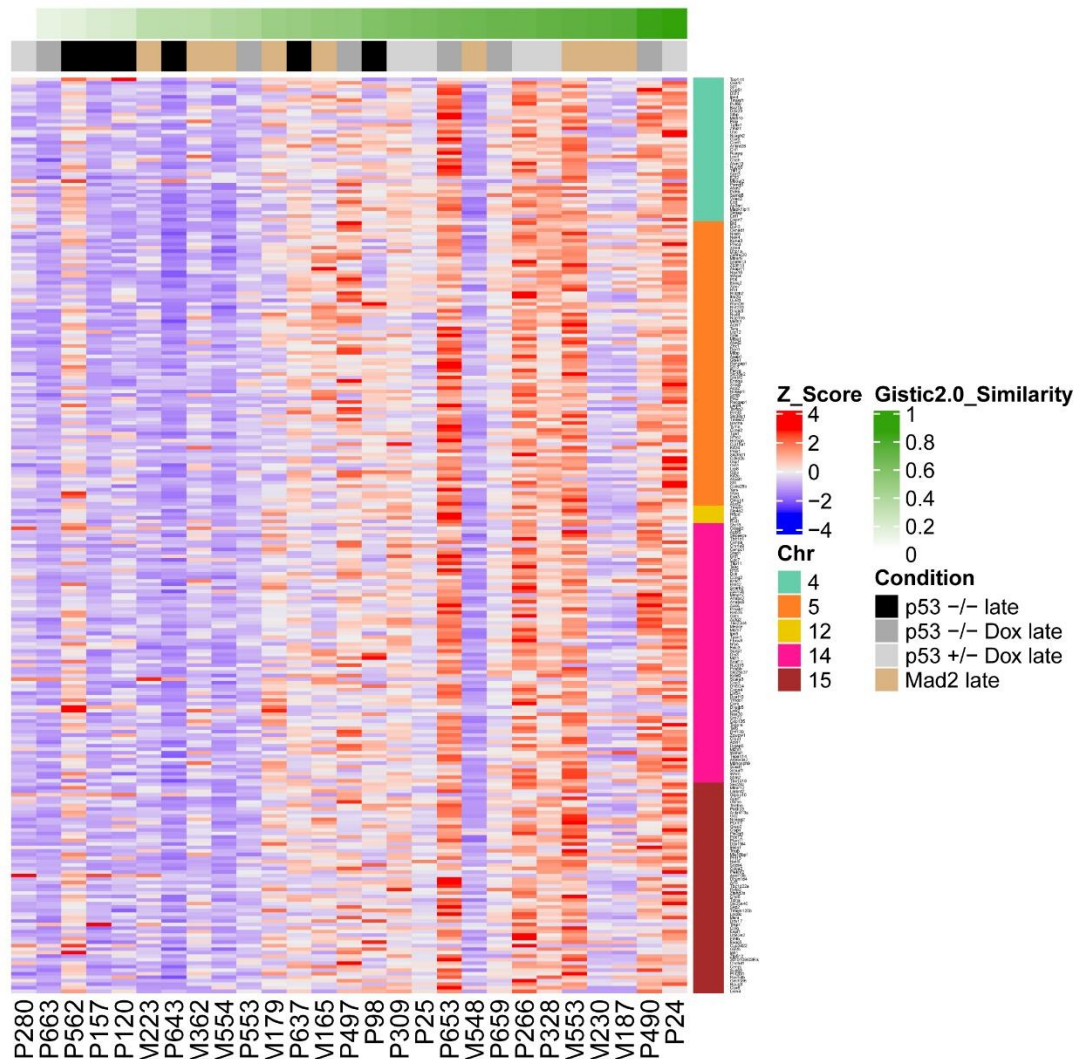

b

| ID                                                             | qvalue  |
|----------------------------------------------------------------|---------|
| REACTOME_M_PHASE                                               | 0.00003 |
| REACTOME_MITOTIC_G1_G1_S_PHASES                                | 0.00003 |
| REACTOME_DNA_REPLICATION                                       | 0.00003 |
| REACTOME_S_PHASE                                               | 0.00007 |
| KEGG_CELL_CYCLE                                                | 0.00011 |
| REACTOME_REGULATION_OF_CHOLESTEROL_BIOSYNTHESIS_BY_SREBP_SREBF | 0.00034 |
| REACTOME_CELL_CYCLE_CHECKPOINTS                                | 0.00053 |
| REACTOME_ACTIVATION_OF_ATR_IN_RESPONSE_TO_REPLICATION_STRESS   | 0.00241 |
| REACTOME_ACTIVATION_OF_GENE_EXPRESSION_BY_SREBF_SREBP          | 0.00451 |
| REACTOME_DNA_REPLICATION_PRE_INITIATION                        | 0.00481 |
| REACTOME_MITOTIC_PROMETAPHASE                                  | 0.00543 |
| REACTOME_SWITCHING_OF_ORIGINS_TO_A_POST_REPLICATIVE_STATE      | 0.00655 |
| REACTOME_ACTIVATION_OF_THE_PRE_REPLICATIVE_COMPLEX             | 0.00850 |
| REACTOME_ONCOGENE_INDUCED_SENESCENCE                           | 0.01062 |
| REACTOME_MITOTIC_METAPHASE_AND_ANAPHASE                        | 0.01988 |
| REACTOME_G1_PHASE                                              | 0.03175 |
| REACTOME_METABOLISM_OF_STEROIDS                                | 0.03213 |



1233 **Supplementary Figure 13 | Acquisition of an aneuploidy specific profile reshapes**  
1234 **expression of genes in cell cycle, replication, and stress networks. (a)** Gene  
1235 expression analysis from RNA sequencing performed in correlation with the similarity  
1236 score derived from comparison to the GISTIC 2.0 score (as shown in Figure 4) of terminal  
1237 tumors from the indicated PRG5 and Mad2 mice. See Supplementary Table 5 for list of  
1238 genes. **(b)** Significantly enriched pathways (identified using msigdb and R/Bioconductor  
1239 package clusterProfiler) in PRG5 and Mad2 derived thymic lymphomas (as shown in  
1240 panel a).

1241

1242

1243

1244

1245

1246

1247

1248

1249

1250

1251

1252

1253

1254

1255

1256

1257

Supplementary Figure 14 | Multiple human cancers acquire the CIN induced gene expression profile, also in correlation with increasing *MYC* expression

a

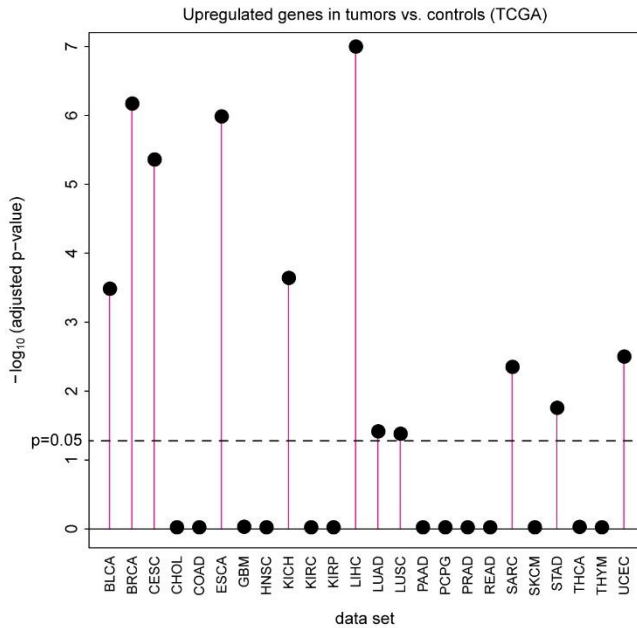

b

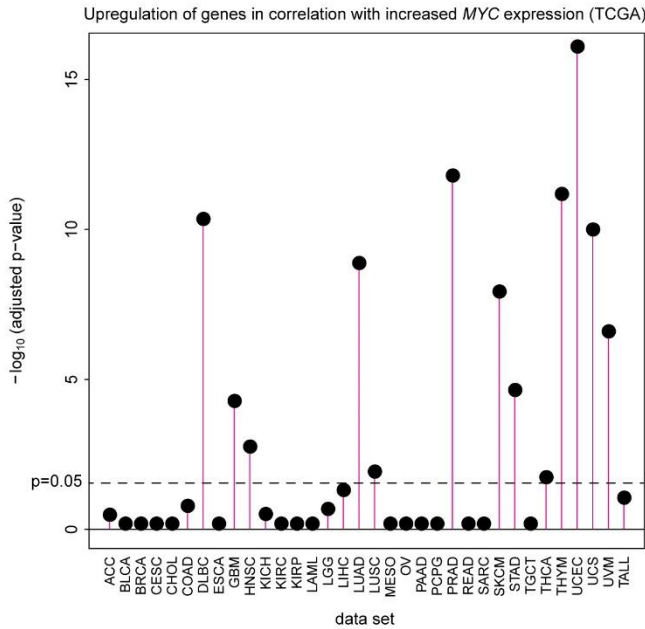

1258

1259 **Supplementary Figure 14 | Multiple human cancers acquire the CIN induced gene**  
 1260 **expression profile, also in correlation with increasing *MYC* expression. (a)**  
 1261 **Enrichment of the CIN induced gene expression profile (Supplementary Table 5) in TCGA**  
 1262 **tumor cohorts gene lists of significantly upregulated genes relative to their non-tumor**  
 1263 **controls. (b) Enrichment of the CIN induced gene expression profile (Supplementary**

1264 Table 5) in TCGA cohorts in correlation with *MYC* expression. A spearman correlation  
1265 coefficient between the gene's expression and MYC expression (among all samples), and  
1266 the posterior probability that the gene is correlated with MYC was calculated. The ranked  
1267 gene lists were then tested for enrichment with Bioconductor fgsea on the CIN induced  
1268 gene expression profile (Supplementary Table 5).

1269

1270 **Supplementary Tables (see attached files):**

1271

1272 **Supplementary Table 1 | Pathological analysis of tissue sections from PRG5 mice.**

1273 **Supplementary Table 2 | Differentially expressed genes between thymic tumors**  
1274 **and control thymuses as determined using RNA sequencing.**

1275 **Supplementary Table 3 | Top 10 T cell receptor sequences sequences per sample**  
1276 **as determined by T cell receptor sequencing**

1277 **Supplementary Table 4 | Similarity to the GISTIC profile of PRG5 and Mad2 tumors**  
1278 **(score ranges between 0-lowest and 1-highest).**

1279 **Supplementary Table 5 | Gene expression analysis in correlation with the similarity**  
1280 **index of each tumor in PRG5 mice (values represent Z scores)**

1281
